1 **Identification and mitigation of pervasive off-target activity in CRISPR-Cas9 screens for**  
2 **essential non-coding elements**

3  
4 Josh Tycko<sup>1,\*</sup>, Michael Wainberg<sup>2,\*</sup>, Georgi K. Marinov<sup>1,\*</sup>, Oana Ursu<sup>1</sup>, Gaelen T. Hess<sup>1</sup>, Braeden  
5 K. Ego<sup>1</sup>, Aradhana<sup>1</sup>, Amy Li<sup>1</sup>, Alisa Truong<sup>1</sup>, Alexandro E. Trevino<sup>3,8</sup>, Kaitlyn Spees<sup>1</sup>, David Yao<sup>1</sup>,  
6 Irene M. Kaplow<sup>2,4</sup>, Peyton G. Greenside<sup>1,5</sup>, David W. Morgens<sup>1</sup>, Douglas H. Phanstiel<sup>1,6,7</sup>, Michael  
7 P. Snyder<sup>1</sup>, Lacramioara Bintu<sup>8</sup>, William J. Greenleaf<sup>1,9,10,#</sup>, Anshul Kundaje<sup>1,2,#</sup>, Michael C.  
8 Bassik<sup>1,11,#</sup>

- 9  
10 1. Department of Genetics, Stanford University, Stanford, California 94305, USA  
11 2. Department of Computer Science, Stanford University, Stanford, California 94305, USA  
12 3. Center for Personal Dynamic Regulomes, Stanford University, Stanford, California, USA  
13 4. Department of Biology, Stanford University, Stanford, California 94305, USA  
14 5. Program in Biomedical Informatics, Stanford University School of Medicine, Stanford,  
15 California 94305, USA  
16 6. Department of Cell Biology and Physiology, University of North Carolina, Chapel Hill, NC  
17 27599, USA  
18 7. Thurston Arthritis Research Center, University of North Carolina, Chapel Hill, NC 27599,  
19 USA  
20 8. Department of Bioengineering, Stanford University, Stanford, California 94305, USA  
21 9. Department of Applied Physics, Stanford University, Stanford, California, USA  
22 10. Chan Zuckerberg Biohub, San Francisco, California, USA  
23 11. Chemistry, Engineering, and Medicine for Human Health (ChEM-H), Stanford University,  
24 Stanford, California 94305, USA

25  
26 \* These authors contributed equally to this work

27 # Corresponding authors

## 28 **Abstract**

29 Pooled CRISPR-Cas9 screens have recently emerged as a powerful method for functionally  
30 characterizing regulatory elements in the non-coding genome, but off-target effects in these  
31 experiments have not been systematically evaluated. Here, we conducted a genome-scale screen  
32 for essential CTCF loop anchors in the K562 leukemia cell line. Surprisingly, the primary drivers  
33 of signal in this screen were single guide RNAs (sgRNAs) with low specificity scores. After  
34 removing these guides, we found that there were no CTCF loop anchors critical for cell growth.  
35 We also observed this effect in an independent screen fine-mapping the core motifs in enhancers  
36 of the *GATA1* gene. We then conducted screens in parallel with CRISPRi and CRISPRa, which  
37 do not induce DNA damage, and found that an unexpected and distinct set of off-targets also  
38 caused strong confounding growth effects with these epigenome-editing platforms. Promisingly,  
39 strict filtering of CRISPRi libraries using GuideScan specificity scores removed these confounded  
40 sgRNAs and allowed for the identification of essential enhancers, which we validated extensively.  
41 Together, our results show off-target activity can severely limit identification of essential functional  
42 motifs by active Cas9, while strictly filtered CRISPRi screens can be reliably used for assaying  
43 larger regulatory elements.

## 44 Introduction

45 Pooled CRISPR-Cas9 screens <sup>1-5</sup> have recently emerged as a powerful tool for characterizing  
46 the functional importance of genes and non-coding genomic elements. In particular, growth  
47 screens have been successfully employed to discover essential genes that determine cell fitness  
48 under normal culture conditions <sup>1,2,6-8</sup>. In addition, CRISPR-Cas9 screens have increasingly been  
49 used to functionally characterize the non-coding genome <sup>9-18</sup>. A variety of approaches have been  
50 devised for interrogating non-coding genomic elements. In some instances, active Cas9 nuclease  
51 is used to edit candidate functional elements (e.g. transcription factor motifs) at the sequence  
52 level by generating indels <sup>10,19</sup>. Alternatively, the epigenetic environment around a locus can be  
53 perturbed using nuclease-dead dCas9 fused to effector domains that can recruit chromatin  
54 silencers that modify histones with repressive marks (CRISPRi) <sup>9,14,20-23</sup> or activators that recruit  
55 transcriptional machinery (CRISPRa) <sup>11,15,23,24</sup>.

56  
57 A challenge in interpreting these screens is that CRISPR-Cas9 can bind or edit at unintended off-  
58 target genomic sites in a manner that depends on the specificity of the sgRNA sequence <sup>25-29</sup>.  
59 For active Cas9, off-target activity at perfectly matched sites <sup>30-33</sup> or sites with 1-2 mismatches  
60 <sup>34,35</sup> has been shown to reduce cell fitness and confound gene-targeting growth screens. This  
61 reduction in cell fitness could be due to accumulating DNA damage from off-target cleavage  
62 events. Conversely, for CRISPRi and CRISPRa, the impact of off-target activity on gene-targeting  
63 growth screens was shown to be minimal <sup>3</sup>. However, the impact of off-target activity on screens  
64 for essential non-coding regulatory elements has not been studied for any of the three  
65 perturbations (active Cas9, CRISPRi and CRISPRa).

66  
67 To mitigate the impact of off-target effects on screens, sgRNA selection is critical. For gene  
68 screens, a large targetable window is present within which all sgRNAs that induce frameshifting

69 indels would be expected to have the same effect on the gene (i.e. a complete knockout), making  
70 the selection of highly specific sgRNAs relatively straightforward<sup>34,36–38</sup>. On the other hand,  
71 screens of non-coding elements that use active Cas9 often require the use of lower specificity  
72 sgRNAs because regulatory elements, such as individual TF motifs, present a more narrow  
73 targeting window from which fewer sgRNAs may be selected.

74  
75 Despite these challenges, CRISPR-Cas9 screens present an opportunity to systematically  
76 perturb and functionally characterize non-coding elements that could not be studied with earlier  
77 high-throughput technologies like shRNAs, gene traps, or ORF libraries. One class of candidate  
78 *cis*-regulatory elements (ccREs) that have not been functionally dissected in a high-throughput  
79 manner are CTCF binding sites in chromatin loop anchors. CTCF binding sites are enriched at  
80 the boundaries that partition interphase vertebrate genomes into TADs (Topologically Associated  
81 Domains)<sup>39,40</sup>, and pairs of convergently oriented CTCF motifs are enriched at the anchors of  
82 chromatin loops<sup>40–42</sup>. These chromatin loops and TADs are thought to constrain enhancer-  
83 promoter interactions, adding a layer of specificity to the *cis*-regulatory wiring that connects genes  
84 with distal regulatory elements. CRISPR-mediated deletions and inversions of individual CTCF  
85 sites have been shown to result in reorganization of TADs<sup>41</sup> and occasionally in changes in gene  
86 expression<sup>43–45</sup>. Moreover, disruptions of CTCF occupancy have been suggested to be involved  
87 in tumorigenesis by leading to pathogenic rewiring of enhancer-promoter interactions<sup>46–49</sup>. In fact,  
88 global degradation of CTCF protein in the cell showed that CTCF is required for the formation and  
89 maintenance of TADs and resulted in 370 differentially expressed genes after one day of CTCF  
90 depletion<sup>50</sup>, albeit with only small fold-changes in expression for those genes. However, these  
91 type of global perturbations do not reveal the functional importance of individual CTCF sites.

92  
93 To address this, we set out to perform a genome-wide non-coding screen for essential CTCF  
94 binding sites in chromatin loop anchors in the K562 leukemia cell line. We were surprised to



95 discover that the dominant source of signal in our screen was not from deregulated expression of  
96 essential genes but was instead consistent with CRISPR-Cas9 off-target activity causing large  
97 reductions in cell fitness. This discovery led us to systematically explore the impact of off-target  
98 activity across a number of different non-coding screen paradigms. We learned that off-target  
99 activity also confounds Cas9 screens for essential functional motifs within enhancers and that  
100 CRISPRi/a platforms are similarly vulnerable to off-target activity that significantly reduces cellular  
101 fitness. We investigated which non-coding elements can be reliably screened with high-specificity  
102 sgRNAs and found that Cas9 screens for essential functional motifs are severely limited by low  
103 availability of high-specificity sgRNAs (as determined by a computational specificity score),  
104 whereas CRISPRi/a libraries can be properly filtered to avoid confounding off-target activity  
105 because their sgRNAs can be selected from a larger targeting window. Together, our results  
106 provide principles for the design and interpretation of high-throughput measurements of regulatory  
107 element essentiality.

## 108 **Results**

### 109 **CRISPR-Cas9 screens for essential CTCF loop anchors in K562**

110 To identify essential CTCF sites, we performed a Cas9 growth screen with an sgRNA library  
111 targeting 4,022 CTCF motifs known to be at loop anchor sites in the K562 cell line according to  
112 available Hi-C and CTCF ChIP-seq evidence<sup>40,51</sup> (**Figure 1A, Supplementary Table 1**). The  
113 library included 2 to 5 sgRNAs per CTCF site that had an expected cleavage site within the motif.  
114 The growth effects, measured as guide enrichment from the original sgRNA library plasmid pool  
115 to the end of the screen, were highly reproducible between the two independently transduced  
116 biological replicates ( $r^2 = 0.75$ , **Figure 1B**). We observed strong growth effects from the internal  
117 positive control sgRNAs that target the exons of essential genes, as well as from sgRNAs

118 targeting the BCR-ABL copy number amplification, which are expected to cause substantial  
119 toxicity due to the creation of multiple DNA double-stranded breaks<sup>30–33,52</sup>. We validated 15  
120 individual sgRNAs using a competitive growth assay, which confirmed the growth effects  
121 observed in the pooled screen ( $r^2 = 0.69$ , **Figure 1C**).

122  
123 To better understand the mechanistic basis for these fitness effects, we characterized the  
124 transcriptional and chromatin landscape of K562 cell lines carrying mutations induced by  
125 individual sgRNAs with validated growth effects. First, we sought to confirm that sgRNAs targeting  
126 CTCF sites can disrupt CTCF binding by performing CTCF ChIP-seq on Cas9-expressing cells  
127 transduced with individual sgRNAs. Indeed, Cas9-induced indels entirely eliminated CTCF  
128 binding at 2 of the 6 motifs that we tested (**Figure 1D**), while they did not result in changes of  
129 CTCF occupancy at untargeted sites in the immediate vicinity or elsewhere in the genome  
130 (**Supplementary Figure 1A,B**). 3 of these 6 sgRNAs appeared to only partially ablate CTCF  
131 binding (in two cases likely due to the presence of other nearby CTCF motifs). A sixth sgRNA  
132 (sg8005) did not affect CTCF binding within the ChIP-seq peak, because the annotated motif we  
133 had targeted was not actually the motif underlying the peak, likely due to imperfect annotation.  
134 Surprisingly, we did not observe any changes in gene expression in the genomic neighborhoods  
135 of these motifs as measured by qPCR and RNA-seq (**Supplementary Figure 1C-L**). We also  
136 performed ATAC-seq for 2 of these sgRNAs and did not find significant changes in chromatin  
137 accessibility (**Supplementary Figure 1M**). Altogether, these data did not identify changes in gene  
138 expression or chromatin structure near the CTCF motifs as likely causes of the observed growth  
139 effects for any of the motifs we aimed to validate. Instead, we wondered whether off-target activity  
140 could explain these results, since off-target effects have previously been found to generate  
141 confounding signal in CRISPR-Cas9 growth screens<sup>30–32,34,35</sup>.

## 142 **Computational model of specificity reveals major confounder in CTCF screens**

143 To explore the possibility that off-target activity was responsible for the screen results, we  
144 retrieved specificity scores<sup>37</sup> for every sgRNA in the libraries. These sgRNA-level scores are  
145 determined by 1) searching reference genomes for off-target binding locations, 2) predicting the  
146 Cas9 activity across those sites given the pattern of mismatches between the sgRNA and the  
147 genomic DNA, and 3) aggregating these predicted Cas9 activities into a final score. Different  
148 implementations of this workflow have resulted in a variety of software tools providing specificity  
149 scores<sup>25,36,37,53–55</sup>. We found that aggregate specificity scores from GuideScan<sup>37</sup> correlate well  
150 with existing data from Guide-seq<sup>27</sup>, an unbiased off-target measurement assay for Cas9  
151 (Spearman's  $\rho = -0.84$ , **Supplementary Figure 2A**), so we used GuideScan scores for  
152 subsequent analyses. GuideScan scores are a weighted function of all off-target locations with 2  
153 or 3 mismatches to the sgRNA spacer. Very low-specificity sgRNAs with  $> 1$  perfect matches in  
154 the genome or  $> 0$  off-target locations with only 1 mismatch are excluded from GuideScan's trie  
155 data structure and were also excluded from our analysis.

156  
157 Immediately, we observed a striking bias for low specificity scores among the sgRNAs that confer  
158 large fitness effects ( $p = 1.1e-31$ , Fisher's exact test, **Figure 1E**). Indeed, the great majority (76%)  
159 of CTCF motif-targeting sgRNAs that have guide-level  $\log_2(\text{fold-change}) \leq -2$  also had GuideScan  
160 specificity scores  $\leq 0.2$  (on a scale of 0 to 1, where 0 indicates least specificity or greatest off-  
161 target activity), representing an 8.4-fold odds ratio. In the case of our CTCF screen, 4% of CTCF  
162 loop anchors had strong evidence of essentiality (Guide enrichment  $\log_2(\text{fold-change}) \leq -2$ ) with  
163 a single sgRNA, but only 0.2% had such evidence from multiple sgRNAs (**Figure 1F**). This  
164 disparity is unexpected given that the sgRNAs targeting the same site should have similar effects,  
165 but is consistent with the sgRNAs having different off-target effects. After filtering for high-  
166 specificity sgRNAs with the GuideScan score, the number of CTCF loop anchors with evidence

167 of essentiality from multiple sgRNAs dropped to zero (out of 2,968 motifs targeted with multiple  
168 high-specificity sgRNAs).

### 169 **Fine-mapping CTCF loop anchors with Cas9**

170 To further test whether off-target activity could explain the hits from the CTCF motif screen, we  
171 designed a fine-mapping sgRNA library targeting 270 CTCF sites, including full tilings of each  
172 such site (all possible sgRNAs within 1 kb), using up to 400 sgRNAs per site (**Figure 2A**). We  
173 chose CTCF sites from four categories: “hits” called by casTLE analysis before filtering with  
174 GuideScan scores, the Hi-C loop partners of these hits, non-hits, and the loop partners of the  
175 non-hits (**Methods**). We expected three possible results from densely tiling the loop anchors: 1)  
176 truly essential CTCF motifs would result in a strong peak of signal from high-specificity sgRNAs  
177 that generate indels near the motif (i.e. +/- 20 bp), 2) regions that were essential for reasons  
178 distinct from the CTCF motif, such as being copy number amplified<sup>30,32,33</sup>, would result in uniformly  
179 strong growth effects from both low- and high-specificity sgRNAs irrespective of whether the  
180 sgRNAs overlap the motifs, and 3) non-functional motifs would only have strong signal from low-  
181 specificity sgRNAs, if any. This fine-mapping screen was performed at high coverage (~12,000  
182 cells per sgRNA), yielded highly reproducible guide effect measurements ( $r^2 = 0.92$ ,  
183 **Supplementary Figure 3A**). As expected, positive control sgRNAs targeting ten essential genes  
184 were strongly depleted (**Supplementary Figure 3B**). We observed uniform depletion of high- and  
185 low-specificity sgRNAs tiling regions near the *BCR-ABL* amplification but not elsewhere  
186 (**Supplementary Figure 3C,D**), as expected. Both high- and low-specificity sgRNAs had strong  
187 growth effects when targeting exons of essential genes but no effect in the neighboring introns  
188 (**Figure 2B**), demonstrating that the fine-mapping screen can discern the short functionally  
189 relevant sequences of coding exons from background with high fidelity. Strikingly, the great  
190 majority (93%) of sgRNAs tiled within the 1 kb CTCF loop anchor regions and that had a strong

191 fitness effect were, again, low-specificity guides with GuideScan scores  $\leq 0.2$  ( $p = 2.3e-233$ ,  
192 Fisher's exact test, **Supplementary Figure 3E**). While the previous motif-targeting library only  
193 used 2-5 sgRNAs per motif, this fine-mapping library included all possible guides overlapping a  
194 window of +/-20 bp of the "hit" CTCF motif centers. Despite this increase in sgRNA density, after  
195 filtering with GuideScan scores, we still found zero CTCF motifs with evidence of essentiality from  
196 multiple high-specificity sgRNAs (**Figure 2C** and **Supplementary Figure 3F,G**). We therefore  
197 concluded that the observed hits in the CTCF screens were consistent with off-target activity.

### 198 **Off-target activity confounds identification of motifs within enhancers**

199 To test our ability to dissect the essentiality of non-coding elements beyond chromatin loop  
200 anchors, we also fine-mapped two enhancers which regulate expression of the essential gene  
201 *GATA1* in K562 cells, tiling them with 110 and 174 sgRNAs to span the entire 611 bp and 1.1 kb  
202 regions, respectively. These enhancers, named eGATA1 and eHDAC6, were previously identified  
203 in a CRISPRi tiling growth screen in K562<sup>9</sup>, but their constituent functional motifs remain  
204 uncharacterized, a gap we sought to fill with higher resolution dissection by Cas9 fine-mapping.  
205 These screens revealed narrow peaks defined by 1-2 sgRNAs that overlapped known TF ChIP-  
206 Seq motifs within the DNase hypersensitive sites in the enhancers<sup>51</sup> (**Figure 2D**). However, these  
207 sgRNAs were again of low specificity, raising doubts that their targets were in fact essential motifs  
208 and motivating a careful validation of the sgRNAs and their effects on *GATA1* expression. We  
209 installed the sgRNAs individually into K562, and found that this resulted in indel mutations (37-  
210 98%) in the genomic DNA at the corresponding target motifs (**Supplementary Figure 4A**). These  
211 sgRNAs also caused significant growth phenotypes (**Supplementary Figure 4B**) which  
212 correlated with the growth effects measured in the pooled screen ( $r^2 = 0.76$ , **Supplementary**  
213 **Figure 4C**). Strikingly, there were no concordant changes in *GATA1* expression as measured by  
214 qPCR, Western blot, or flow cytometry (**Figure 2E-G** and **Supplementary Figure 4D**). These

215 experiments demonstrate that even sgRNAs targeting TF motifs in bona fide enhancers can have  
216 reproducible growth screen effects that are unrelated to the expression of their nearby essential  
217 gene, and that the GuideScan specificity score is useful to help identify such confounded sgRNAs.

### 218 **CRISPRi and CRISPRa off-target activity also causes confounding growth effects**

219 CRISPRi and CRISPRa have also been used to screen for functional non-coding elements, but  
220 the potentially confounding effect of off-target activity with these platforms in the context of non-  
221 coding essential regulatory elements has not been studied. To systematically compare these  
222 technologies, we performed a tiling screen around three essential genes in K562 cells (*GATA1*,  
223 *MYB*, and *ZMYND8*); the library consisted of a total of 32,791 sgRNAs targeting a total of 794 kb  
224 including candidate regulatory elements, annotated exons and intervening genomic space. We  
225 screened this library with four different CRISPR-Cas9 platforms: active Cas9, nuclease-dead  
226 dCas9, CRISPRi (dCas9-KRAB<sup>23</sup>), and CRISPRa (dCas9-SunTag-VP64<sup>57</sup>) (**Figure 3A**). As  
227 expected, in the active Cas9 screen we observed strong negative fitness effects for sgRNAs  
228 targeting exons, and in the CRISPRi screen we observe strong signals for sgRNAs targeting  
229 known essential enhancers and promoters<sup>9,52</sup> (**Figure 3B** and **Supplementary Figure 5A-D**).  
230 We also found that for CRISPRa and dCas9 screens, sgRNAs that targeted transcriptional start  
231 sites (TSS) of essential genes exhibit negative fitness effects (**Figure 3B** and **Supplementary**  
232 **Figure 5D**); for dCas9, this observation may be due to the binding of dCas9 interfering with the  
233 transcriptional initiation machinery<sup>23,58</sup>.

234  
235 However, for each screening modality we also noticed sgRNAs with strong negative fitness effects  
236 that did not target candidate regulatory elements or annotated coding sequences and for which  
237 neighboring sgRNAs did not exhibit concordant effects (**Figure 3B**). Again, we suspected that the  
238 growth effects of these guides might be due to off-target activity and retrieved GuideScan  
239 specificity scores in order to investigate this possibility. Indeed, we observed a striking enrichment

240 for low-specificity sgRNAs among the set of sgRNAs with strong negative fitness effects in the  
241 Cas9, CRISPRi, and CRISPRa screens ( $p < 1.9e-21$  for all, Fisher's exact test, **Figure 3C**). We  
242 questioned whether the sets of sgRNAs with putative off-target activity were highly overlapping  
243 between each CRISPR-Cas9 platform. Strikingly, this was not what we observed. In fact, sets of  
244 low-specificity sgRNAs that show significant fitness effects with Cas9, CRISPRi or CRISPRa are  
245 largely non-overlapping (**Figure 3D**), suggesting the off-target effects are specific to each  
246 CRISPR-Cas9 platform. Thus, off-target growth effects appear to be a function of both the sites  
247 targeted by an sgRNA and the mode of perturbation.

248  
249 We questioned whether these off-target growth effects were purely a function of the absolute  
250 number of off-target sites or specific to a subset of off-target sites. We and others have shown  
251 that, in the context of coding gene screens, the number of perfect matches or 1-mismatch off-  
252 targets correlates with growth phenotypes<sup>34,35</sup>. However, the analyses presented here do not  
253 include any sgRNAs with perfect genomic matches at any other place in the genome, nor sgRNAs  
254 with 1-mismatch off-targets. Across all four CRISPR-Cas9 platforms used in the tiling screens,  
255 the GuideScan score was predictive of off-target effects on cell fitness (**Figure 3C** and  
256 **Supplementary Figure 6A**), yet there was very weak correlation between growth effects and the  
257 absolute number of off-target sites (with 2 or 3 mismatches each), especially for CRISPRi/a  
258 (**Supplementary Figure 6B,C**). Indeed some outlier sgRNAs with thousands of off-target sites  
259 had no effects on growth. Thus, when designing and interpreting screens, the propensity to bind  
260 or cut as captured by the specificity score should be considered, rather than simply the number  
261 of off-target binding locations.

262 **CRISPRi screens filtered for high-specificity sgRNAs specifically detect essential**  
263 **regulatory elements**

264 While the appearance of confounding off-target activity in CRISPRi screens was unexpected,  
265 GuideScan scores proved useful to identify confounded sgRNAs. We next asked if the removal  
266 of low-specificity sgRNAs would improve the reliable identification of expected regulatory  
267 elements (e.g. the TSS and the two enhancers of *GATA1*). We thus filtered out guides with  
268 GuideScan scores  $\leq 0.2$ , which did indeed remove confounded sgRNAs while preserving strong  
269 CRISPRi signal at these enhancers and promoters (highlighted regions in **Figure 3E**).

270

271 To confirm that these high-specificity sgRNAs in peaks had bona fide effects on the expression  
272 of *GATA1*, we delivered single guides by lentivirus and measured *GATA1* expression by qPCR  
273 and Western blot (**Figure 3F,G**). Whereas targeting the *GATA1* TSS or a CRISPRi peak 500 bp  
274 downstream of the TSS both resulted in near-complete knockdown (to 4-9% of protein levels in  
275 the control cells), the enhancer-targeting sgRNAs provided partial knockdown (to 40-63% of  
276 control protein levels), and expression levels were highly correlated between RNA-level qPCR  
277 and protein-level Western blot ( $R^2 = 0.92$ , **Supplementary Figure 7A**). Flow cytometry for *GATA1*  
278 protein levels confirmed that CRISPRi enhancer repression resulted in partial knockdown across  
279 the population of cells, as opposed to complete silencing observed when targeting the TSS  
280 (**Figure 3H**). Together, these experiments validated that the high-specificity sgRNAs from the  
281 tiling CRISPRi screen resulted in on-target repression of the expected essential gene.

282 **CRISPRi/a off-target activity is a confounder in other non-coding growth screens**

283 We next wondered if off-target activity might confound other CRISPRi/a non-coding growth  
284 screens for other types of elements. To directly compare the different CRISPR-Cas9 platforms  
285 with a shared library of sgRNAs, we performed parallel screens with our CTCF motif-targeting



286 sgRNA library in K562 using CRISPRi, CRISPRa, dCas9, and Cas9 (**Supplementary Figure 8A-**  
287 **C**). When we analyzed the specificity scores of this library, we found that these CRISPRi and  
288 CRISPRa screens again showed a significant bias towards low-specificity sgRNAs having strong  
289 growth effects (**Supplementary Figure 8D**). The Cas9 screen in this experiment was maintained  
290 with lower coverage (cells per sgRNA) and was thus noisier than the Cas9 screen in **Figure 1**;  
291 interestingly, we found that this enrichment for low-specificity sgRNAs was less pronounced but  
292 remained highly significant ( $p = 1.1e-9$ , Fisher's exact test), showing that the signature of off-  
293 target effects can be disguised in noisy screens. As with our tiling library, we found that the sets  
294 of low-specificity sgRNAs that show significant fitness effects with Cas9, CRISPRi or CRISPRa  
295 are largely non-overlapping, reproducing the previous observation that off-target effects are  
296 specific to each CRISPR-Cas9 perturbation (**Supplementary Figure 8E**). Again, the CRISPRi/a  
297 growth phenotypes were not reproduced when employing dCas9 with the same sgRNAs,  
298 demonstrating these off-target effects are not due to dCas9 binding alone.

299  
300 To investigate the generality of these CRISPRi off-target growth effects across cell types, we  
301 retrieved GuideScan specificity scores for guide libraries from published screens targeting the  
302 promoters of genes with dCas9-KRAB-MeCP2 in SH-SY5Y and HAP1 cells<sup>59</sup>. These screens  
303 found reproducible, validated hits, but also found that some sgRNAs targeting known non-  
304 essential genes had unexpected growth effects. Here, we found that these sgRNAs also had  
305 lower specificity scores (**Supplementary Figure 9C**). These results suggest that using CRISPRi  
306 with low-specificity sgRNAs can be associated with strong fitness effects in other cell types.

### 307 **Impact of low-specificity sgRNAs on non-coding screen designs**

308 Finally, we investigated the extent to which non-coding elements can be targeted with high-  
309 specificity sgRNA libraries. To address this question, we characterized the distribution of  
310 GuideScan specificity scores for a number of possible screen designs. We observed that our tiling

311 screen and CTCF site screen libraries contained significantly more low-specificity sgRNAs than  
312 Brunello <sup>36</sup>, a genome-wide coding gene-targeting library ( $p < 0.0001$ , Mann-Whitney test, **Figure**  
313 **4A**), reflecting the inherently poorer specificity of sgRNA libraries that densely tile regions or target  
314 relatively small motifs. We then designed libraries targeting all candidate cis-regulatory elements  
315 (or ccREs) which were identified in the ENCODE SCREEN databases <sup>60,61</sup>. At the time of our  
316 analysis, the SCREEN databases contained 1.31 million individual ccREs, with a median length  
317 over 200 bp (**Supplementary Figure 10A**). We specifically focused on CRISPRi/a epigenetic  
318 perturbation designs and imposed a minimum requirement of including at least 5 sgRNAs of  
319 sufficiently high specificity for each element (to enable robust statistical analyses of functional  
320 effects at the element level). We find that 89% of SCREEN ccREs can be targeted with  $\geq 5$   
321 sgRNAs at a GuideScan cutoff of 0.2 (**Supplementary Figure 10B**) although this varies by type  
322 of target element. For example, we find that 62% of human lncRNA TSS elements can be targeted  
323 with  $\geq 5$  CRISPRi sgRNAs with a specificity score  $> 0.2$ , even when selecting sgRNAs from a  
324 conservative window of only  $\pm 100$  bp from the TSS (**Figure 4B**). Overall, most ccREs can be  
325 targeted with epigenome editing tools even after filtering the sgRNAs that are most likely to be  
326 confounded by off-target effects.

327

328 However, most ccREs are composed of multiple regulatory units, such as transcription factor  
329 binding sites (TFBSs), and achieving proper mechanistic understanding of ccRE function will  
330 require perturbing these regulatory units, individually or in combination. To assess the ability of  
331 Cas9 to enable more fine-grained regulatory element mapping, we designed motif-level screens  
332 for 27 different human TFs targeting all of their annotated and occupied motifs in K562 cells and  
333 summarized the specificity score distributions for each. We find that guide specificity filtering  
334 restricts the ability to target TF motifs to a varying extent for different TFs: for example, only 31%  
335 of CEBPB motifs can be targeted with even a single overlapping sgRNA at a GuideScan cutoff of

336 0.2 (**Figure 4C**), whereas for TFs such as ETS1, 64% motifs can be targeted with 5 or more such  
337 guides. Taken as a whole, Cas9 TF motif screens, as well as splice site screens (**Supplementary**  
338 **Figure 10C**), are subject to more limiting design restrictions than screens targeting ccREs with  
339 CRISPRi/a, because the sgRNAs for these Cas9 non-coding screens must overlap the narrow  
340 target element directly while sgRNAs for CRISPRi/a ccRE screens can be selected from a larger  
341 targeting window. These designs provide a guideline for focusing future screens for essential  
342 regulatory elements on the motifs and ccREs that can be targeted with high-specificity guides.

## 343 **Discussion**

344 Here, we found that pervasive off-target activity confounds Cas9, CRISPRi, and CRISPRa  
345 screens for essential regulatory elements by conducting several screens using sgRNA libraries  
346 designed to edit motifs and tile regions of interest in an unbiased fashion.

347  
348 We and others have previously shown that off-target DNA damage from Cas9 nuclease activity  
349 affects growth screen measurements<sup>30-35</sup>; this work extends these observations to non-coding  
350 growth screens. Indeed, we find that low-specificity sgRNAs are the dominant confounding factor  
351 complicating the analysis and interpretation of screens for essential regulatory elements and that,  
352 somewhat surprisingly, this conclusion holds not only for active Cas9 screens but also for dCas9-  
353 mediated perturbations such as CRISPRi and CRISPRa. Cas9 generates double-strand breaks  
354 (DSB), so a large number of off-targets for a given sgRNA could result in a major fitness effect  
355 due to cellular toxicity as a result of activation of the DNA damage response and apoptosis<sup>30,32-</sup>  
356<sup>34,52</sup>, regardless of the location of off-target sites. In contrast, dCas9-recruited epigenetic  
357 perturbations do not generate DSBs, and their off-target effects are expected to be location-  
358 dependent. Interestingly, these off-target effects cannot be fully accounted for by dCas9 binding  
359 itself, as we tested the same sgRNAs with all four CRISPR-Cas9 platforms, and nearly all sgRNAs

360 showed reduced or unmeasurable growth effects with dCas9 alone.

361

362 As a prime example of the impact that off-target effects can have, growth screens targeting CTCF  
363 sites in K562 cells returned only hits that on closer examination were confounded by off-target  
364 activity. None of the CTCF sites that we characterized in more detail in cell lines expressing  
365 sgRNAs had a measurable impact on gene expression or chromatin states in the genomic  
366 neighborhood (**Supplementary Figure 1**), even when the Cas9 editing induced total loss of CTCF  
367 binding at the target motif (**Figure 1D**). A recent study reported that acute global degradation of  
368 all CTCF protein in cells<sup>50</sup> did not result in dramatic changes in gene expression. Thus, it is  
369 perhaps not surprising that the disruption of individual CTCF sites does not exhibit major  
370 phenotypic effects. It remains possible that some of the loop anchor CTCF motifs we targeted  
371 may be functional but redundant, or CTCF sites with the greatest functional relevance under  
372 standard growth conditions may not actually be at loop anchors. In terminally differentiated cells,  
373 such as K562, chromatin states may not be dramatically disrupted by the absence of an individual  
374 loop anchor CTCF site. The critical regulatory roles of CTCF may have to be studied in the context  
375 of embryonic development and cell differentiation, processes during which chromatin states are  
376 being established and CTCF loops likely serve an important role in the partitioning of the genome  
377 <sup>62–65</sup>.

378

379 Our findings have significant implications for the design and analysis of future screens. Given that  
380 1) validation experiments of individual screen hits are time-intensive and low-throughput, and 2)  
381 there is a growing interest in global analyses of aggregated non-coding screen data,  
382 computational models for filtering out low-specificity sgRNAs are crucial to identify bona fide hits  
383 and to diagnose systemic problems before data aggregation. We find that off-target effects on cell  
384 fitness are not predictable solely from the absolute number of off-target sites for these sgRNAs,  
385 although that simple metric is often used when designing and ranking sgRNAs. In contrast, we

386 find that the data-driven GuideScan specificity score, which accounts for the position and type of  
387 mismatches to provide a weighted assessment of Cas9's affinity for each potential off-target site,  
388 provides a more accurate determination of off-target potential. The striking correlation of this score  
389 with fitness effects in non-coding screens, and also with direct measurements of off-target cutting  
390 using Guide-Seq, has not been described in the literature. Surprisingly, even though this score  
391 was not trained on CRISPRi/a screens, and CRISPRi/a off-targets are distinct from those of Cas9  
392 nuclease (**Figure 3D**), the score was effective in identifying CRISPRi/a off-target effects.

393

394 We find that targeting a substantial fraction of individual TFBSs with high-specificity sgRNAs when  
395 using Cas9 is often impossible, although this fraction varies widely between different TFs. This  
396 constraint imposes a significant limitation on Cas9 growth screens directed at elements as small  
397 as TFBSs (< 30 bp). On the other hand, at the level of an individual ccRE (> 150 bp), sufficiently  
398 many high-specificity sgRNAs can generally be found for CRISPRi and CRISPRa screens.  
399 Notably, coding gene screens also benefit from larger available sequence from which to choose  
400 sgRNAs.

401

402 However, GuideScan models only the potential extent of off-target cleavage activity and very  
403 frequently gives low specificity scores for sgRNAs that have no effect on the phenotypic outcome  
404 of cell growth. One exciting future direction suggested by our study is the development of models  
405 to predict the phenotypic consequence of off-target activity, which can now be enabled by high-  
406 throughput datasets such as these. By integrating features including the chromatin state of off-  
407 target binding locations and the essentiality of genes near those off-target locations, it may be  
408 possible to tailor models to predict which particular sgRNAs would be confounded if used with  
409 each CRISPR-Cas9 platform.

410

411 We expect that the impact of low-specificity guides is dependent on the phenotype being  
412 screened. Low-specificity sgRNAs have a greater potential to confound growth screens, likely  
413 because proliferation is affected by many factors in the cell, while screens employing different  
414 selection strategies may be less sensitive to these effects. Studies of ccRE effects that involve  
415 measuring the RNA or protein products of cognate genes, separating cell populations according  
416 to expression levels, and then identifying the particular sgRNAs associated with each expression  
417 level may also be less affected by off-target effects. Similarly, experiments that couple CRISPR-  
418 Cas9 screens to single-cell readouts of gene expression<sup>66–70</sup> or chromatin accessibility<sup>71</sup> may  
419 likewise overcome limitations associated with growth as a readout.

420

421 Regardless, limitations remain that will be best addressed by the development of perturbation  
422 systems that either expand the targetable sequence space or minimize off-targets. Efforts in both  
423 of these directions are ongoing, e.g. devising guide design strategies that reduce off-target effects  
424 such as truncated guides<sup>34,72</sup>, engineering high-specificity variants of Cas9<sup>73–76</sup>, and exploring  
425 the possibilities for adapting other CRISPR enzymes without strict PAM requirements<sup>16,77–79</sup>. We  
426 expect that the combination of technological improvements, judicious screen design, and careful  
427 data analysis that explicitly considers guide specificity will enable the comprehensive functional  
428 characterization of the essential regulatory elements in the human genome.

## 429 **Materials and Methods**

### 430 **Cell lines and cell culture**

431 All experiments presented here were carried out in K562 cells (ATCC CCL-243) grown as  
432 previously described <sup>7</sup>. Cells were cultured in a controlled humidified incubator at 37°C and 5%  
433 CO<sub>2</sub>, in RPMI 1640 (Gibco) media supplemented with 10% FBS (Hyclone), penicillin (10,000  
434 I.U./mL), streptomycin (10,000 ug/mL), and L-glutamine (2 mM). Experiments were performed in  
435 four modified K562 cell lines: K562 stably expressing SFFV-Cas9-BFP, K562 expressing SFFV-  
436 dCas9-BFP, K562 expressing dCas9-SunTag-VP64 <sup>3</sup> (CRISPRa), and K562 expressing SFFV-  
437 dCas9-KRAB-BFP (CRISPRi). The CRISPRa cell line expressing the SunTag system was a gift  
438 from the lab of Jonathan Weissman.

439

### 440 **CTCF motif-targeting sgRNA library design**

441 We selected CTCF motifs in loop anchors to target as follows. We started with 6,057 loops present  
442 in K562 cells and focused on the 4,892 loop anchors that had previously annotated motifs  
443 overlapping ChIP-seq peaks <sup>40</sup> for CTCF (using STORM <sup>83</sup>), such that the CTCF motifs were  
444 convergently oriented into the loop, which is suggested to be the correct orientation for loop  
445 formation. We further restricted to 4,172 loop anchor CTCF motifs that could be targeted with  
446 at least two sgRNAs per site, as defined by our guide filtering criteria below. Some of these targets  
447 were in exons of genes or near the BCR-ABL amplification, so they were treated separately during  
448 analysis, resulting in a final count of 4,022 “Type 0” CTCF loop anchor motifs. Finally, a set of  
449 control sgRNAs targeting safe regions was added. Briefly, safe-targeting negative control sgRNAs  
450 are highly filtered to target a non-functional genomic site and avoid having severe growth effects  
451 while controlling for the effect of inducing a double strand break (Morgens et al., 2017). An  
452 additional 310 CTCF and Rad21 sites (“Types 1 - 5”) were selected with alternative methods  
453 **(Supplementary Materials & Methods)** and also targeted with sgRNAs in the library, but these

454 were filtered out during analysis and not included in **Figure 1** for the sake of clarity and because  
455 this small alternative set was similarly confounded by off-target activity and lacking hits. For sites  
456 that passed our filtering criteria, we selected a maximum of 5 sgRNAs per site.

457  
458 To minimize off-target effects, we filtered out sgRNAs that had exact or 1-mismatch off-target  
459 instances within a CTCF site or inside exons of GENCODEv19<sup>84</sup> genes. We also filtered out  
460 guides with > 2 0-mismatch, > 10 1-mismatch, > 50 2-mismatch or > 200 3-mismatch genome-  
461 wide off-targets. We defined off-target matches by aligning the guides to the hg19 version of the  
462 human genome using BWA 'aln' with the flags -N -n 4 -o 0 -k 0 -l 7<sup>85</sup>. We also filtered out guides  
463 with too low (< 20%) or too high (> 80%) GC content and guides containing so-called "confounding  
464 oligonucleotides" that might affect the expression of the guide or PCR steps, where "confounding  
465 oligonucleotides" are defined as those that either end in "GGGGG," contain "TTTT," or contain  
466 restriction cut sites ("CTGCAG," "GAAGAC," "GTCTTC," "CCANNNNNTGG," "GCTNAGC").

467

#### 468 **CTCF sgRNA screen execution**

469 Oligonucleotide libraries (**Supplementary Table 1**) were synthesized by Agilent and then cloned  
470 into an sgRNA expression vector pMCB320 (**Supplementary Table 2**) that had been cut with  
471 BstXI and BlnI restriction enzymes, by ligation using T4 ligase, as previously described<sup>34</sup>. Large  
472 scale lentivirus production and infection of K562-Cas9 cells were performed as previously  
473 described<sup>86,87</sup>. Selection with puromycin was started three days after infection and continued for  
474 3-4 days until the mCherry-positive percentage of cells was greater than 80%, as observed by  
475 flow cytometry on a BD Accuri. Cells were then maintained at 3,000x coverage (cells per sgRNA).  
476 Cells were maintained in log growth conditions each day by diluting cell concentrations back to a  
477  $0.5 \times 10^6$  cells/mL. These conditions were also used for the dCas9, CRISPRi, and CRISPRa  
478 screens performed with this library.

479



480 Genomic DNA was extracted following Qiagen's Blood Maxi Kit, and the guide composition was  
481 sequenced and compared to the plasmid library using casTLE <sup>7</sup> version 1.0 available at  
482 <https://bitbucket.org/dmorgens/castle>.

483  
484 The screen was repeated in K562-Cas9 cells at 11,000x maintenance coverage for 23 days,  
485 starting from a frozen aliquot of cells after library transfection and puromycin selection (frozen at  
486 day 6). After the screen, genomic DNA was harvested and sgRNAs were amplified and  
487 sequenced as previously described <sup>7,88</sup>. The high-coverage screen showed better reproducibility  
488 between biological replicates (**Supplementary Figure 8C**) and was used for all analyses shown  
489 in the main text (**Figure 1**).

490

#### 491 **Fine-mapping screen library design**

492 The fine-mapping screen employed densely tiled sgRNAs in short 1 kb windows around CTCF  
493 motifs, enhancers, and exons of essential genes. First, we densely tiled the regions around the  
494 CTCF motif screen hits as identified by casTLE (see below), a GC-matched set of regions around  
495 non-hit CTCFs, and the "loop partner" CTCFs that looped to any of these positive or negative  
496 CTCFs in a K562 Hi-C dataset <sup>40</sup>. Non-hit CTCFs were selected from the set of CTCF sites with  
497 enrichment magnitudes less than 0.5 for all guides in all motif-targeting Cas9, CRISPRi/a, and  
498 dCas9 screens. We selected all sgRNAs provided by the GuideScan design tool within the CTCF  
499 motif and up to 500 bp on each side, for a total of 1020 bp. For each CTCF hit, we selected a  
500 1020-bp region around a 'GC-matched' non-hit CTCF with a GC content within 5% of the GC  
501 content of the 1020-bp region around the CTCF hit. Additionally, we densely tiled the essential  
502 enhancers eGATA1 and eHDAC6 as positive controls and added 1000 safe-targeting guides as  
503 negative controls. As an additional positive control, we included all guides from a 10-guide gene-  
504 targeting library <sup>34</sup> for the essential genes *CTCF*, *RAD21*, *SMC1A*, *SMC3*, *MYC*, *GATA1*, *MYB*,  
505 *RPS28*, *RPS29*, and *RPS3A*.

506

### 507 **Fine-mapping screen execution**

508 The screen was executed with the same protocol as the others at a maintenance coverage of  
509 approximately 12,000 K562 cells per sgRNA. After 20 days, genomic DNA was harvested and  
510 sgRNAs were amplified and sequenced with an Illumina NextSeq to a depth of 2,333 - 3,153  
511 reads per sgRNA using a previously described protocol <sup>88</sup>.

512

### 513 **Tiling screen library design and execution**

514 We designed an sgRNA library (referred to from now on as the “tiling screen” library) that would  
515 allow us to compare different CRISPR-Cas9 platforms in an unbiased fashion. To this end, we  
516 decided to focus on a limited set of genes with an already known strong growth effect, specifically  
517 *GATA1* [guides covering the genomic region chrX:48544984-48752721 (in hg19 coordinates),  
518 covering a total region of 207.737 kb, with tiling density  $9308/207.737\text{kb} = \sim 44$  guides per  
519 kilobase], *MYB* (guides covering the genomic region chr6:135402680-135640267, covering a  
520 total region of 237.587 kb, with tiling density  $9200/237.587\text{kb} = \sim 38$  guides per kilobase), and  
521 *ZMYND8* (guides covering the genomic region chr20:45737857-46085556, covering a total region  
522 of 347.699 kb, with tiling density of  $14282/347.699\text{kb} = \sim 41$  guides per kilobase). These regions  
523 were determined by tiling the full annotated gene sequence and then extending the tiling for an  
524 additional 100 kb in either direction.

525

526 We filtered guides as follows. We discarded guides that had any exact or one-mismatch targets  
527 in DNase-hypersensitive sites <sup>60</sup> or exons. We also filtered out sgRNAs that had any perfect  
528 matches in the genome, or > 10 1-mismatch, > 50 2-mismatch or > 200 3-mismatch genome-wide  
529 off-targets. Matches were defined by aligning the guides to the genome using BWA ‘aln’ with the  
530 flags -N -n 4 -o 0 -k 0 -l 7 <sup>85</sup>.

531

532 To allow direct comparison of effect sizes of regulatory elements in the screen with those of genes,  
533 we also included guides targeting the coding regions of the 3 genes of interest (10 guides per  
534 gene). Finally, we added a set of 1000 control guides targeting “safe” regions as defined  
535 previously<sup>34</sup>.

536

537 The screen was executed with the same protocol as the others. After 14 days, genomic DNA was  
538 harvested and sgRNAs were amplified and sequenced as previously described<sup>88</sup>.

539

#### 540 **Screen data analysis**

541 The castLE v1.0 framework<sup>7</sup> was used to process screen data, including alignment of reads to  
542 an index of guide oligos, subsequent guide filtering, and estimation of effects on cell growth. For  
543 growth screens, enrichment scores were calculated by comparing samples from the final day (day  
544 14, 21, or 23, depending on the screen) with the plasmid library.

545 For the CTCF motif screen, we ran makeIndices.py with parameters ‘-s 31 -e 37’ and  
546 makeCounts.py with parameters ‘-l 20’; we also grouped sgRNAs that target the same motif to  
547 measure motif-level effects and called hits using combined biological replicates with a 10% false  
548 discovery rate, using the script analyzeCombo.py. For the fine mapping screen, we ran  
549 makeIndices.py with parameters ‘-s -34 -e 17’ and makeCounts.py with parameters ‘-l 17 -m 0 -s  
550 -’. For the tiling screen, we ran makeIndices.py with parameters ‘-s 11 -e 17’ and makeCounts.py  
551 with parameters ‘-l 19’.

552

#### 553 **GuideScan specificity scores**

554 We retrieved GuideScan v1.0<sup>37</sup> specificity scores from the webtool. GuideScan forgoes short  
555 string alignment (e.g. BWA) to find off-target locations and instead recovers locations from a pre-  
556 computed trie data structure; it then computes Cutting Frequency Determination (CFD) scores<sup>36</sup>  
557 for all off-target locations with 2 to 3 mismatches, and then aggregates them with the summation

558 formula from the CRISPR MIT tool <sup>25</sup> (dividing 1 by the sum of 1 plus all the CFDs), such that  
559 sgRNAs with more off-target activity approach GuideScan scores of 0. GuideScan does not  
560 provide scores for sgRNAs with multiple perfect genomic matches or off-targets that only differ by  
561 1 mismatch, which are assumed to be too poor specificity for use in experiments, so we also  
562 excluded such sgRNAs from the analyses using GuideScan.

563

### 564 **Competitive growth assays**

565 Competitive growth assays were performed, similarly to a previous description <sup>88</sup>, with stable  
566 K562 lines expressing Cas9, CRISPRi, or CRISPRa that were lentivirally transduced with a vector  
567 (pMCB320) expressing the sgRNA and mCherry and then, after 2 to 3 days, selected with  
568 puromycin for 3 to 4 days, until the mCherry+ fraction of cells was > 90%. Then 40,000 of these  
569 mCherry+ cells were mixed 1:1 with blank cells from the parental line (Day 0) in 1 mL of fresh  
570 RPMI media and grown in triplicate or quadruplicate in 24-well plates. The cells were maintained  
571 at a confluence less than 1e6 cells per mL. The changes in the mCherry+ proportion of cells were  
572 measured on an Accuri BD C6 flow cytometer on Day 0, 4, and 7 and gating on mCherry  
573 expression in channel FL3.

574

### 575 **Motif mapping**

576 Transcription factor motif recognition sequences were mapped genome-wide using FIMO <sup>89</sup>  
577 (version 4.12.0 of the MEME-Suite <sup>90</sup> using the CIS-BP database <sup>91</sup> as a reference set of position  
578 weight matrices.

579

### 580 **External datasets**

581 Data on the fitness effect of protein coding genes in K562 cells was obtained from previously  
582 published studies <sup>7,52</sup>. Uniformly processed ChIP-seq and DNase-seq datasets were obtained

583 from the ENCODE portal (<https://encodeproject.org>). Data on dCas9-KRAB-MeCP2 screens were  
584 retrieved from the published supplementary materials <sup>59</sup>.

585

### 586 **ChromHMM annotations**

587 ChromHMM <sup>56</sup> tracks for K562 chromatin state <sup>51</sup> were retrieved from  
588 <https://egg2.wustl.edu/roadmap/data/byFileType/chromhmmSegmentations/ChmmModels/core>  
589 [Marks/jointModel/final/E123\\_15\\_coreMarks\\_mnemonics.bed.gz](https://egg2.wustl.edu/roadmap/data/byFileType/chromhmmSegmentations/ChmmModels/coreMarks/jointModel/final/E123_15_coreMarks_mnemonics.bed.gz) and visualized with the WashU  
590 Epigenome Browser <sup>92</sup>.

591

### 592 **ChIP-seq experiments**

593 ChIP-seq experiments were carried out as previously described <sup>93</sup> with some modifications.  
594 Briefly, 2e7 K562 cells were pelleted at 2000 g for 5 minutes at 4°C and then resuspended in 1x  
595 PBS buffer; 37% formaldehyde solution (Sigma F8775) was added at a final concentration of 1%.  
596 Crosslinking was carried out at room temperature for 15 minutes, and then the reaction was  
597 quenched by adding 2.5M Glycine solution at a final concentration of 0.25M. Crosslinked cells  
598 then were pelleted 2000 g for 5 minutes at 4°C, washed with cold 1x PBS buffer, and stored at -  
599 80°C.

600

601 CTCF ChIP was performed using a polyclonal anti-CTCF antibody (Millipore, 07-729). For each  
602 reaction, 100 uL of Protein A Dynabeads (Thermo Fisher 10001D) were washed 3 times with a 5  
603 mg/mL BSA (Sigma A9418) solution. Beads were then resuspended in 1 mL BSA solution and 4  
604 uL of CTCF antibody were added. Coupling of antibodies to beads was carried out overnight on  
605 a rotator at 4°C. Beads were again washed 3 times with BSA solution, resuspended in 100 uL of  
606 BSA solution, mixed with 900 uL sonicated chromatin and incubated overnight on a rotator at 4°C.  
607 Chromatin was sonicated using a tip sonicator (Misonix) after cells were lysed with Farnham Lysis  
608 Buffer (5 mM HEPES pH 8.0, 85 mM KCl, 0.5% IGEPAL, Roche Protease Inhibitor Cocktail), and

609 nuclei were resuspended in RIPA buffer (1x PBS, 1% IGEPAL, 0.5% Sodium Deoxycholate, 0.1%  
610 SDS, Roche Protease Inhibitor Cocktail). The sonicated material was centrifuged at 14,000 rpm  
611 at 4°C for 15 minutes to remove cellular debris, and a portion of the supernatant was saved as  
612 input. After incubation with chromatin, beads were washed 5 times with LiCl buffer (10 mM Tris-  
613 HCl pH 7.5, 500 mM LiCl, 1% NP-40/IGEPAL, 0.5% Sodium Deoxycholate) by incubating for 10  
614 minutes at 4°C on a rotator and then rinsed once with 1x TE buffer. Beads were then resuspended  
615 in 200  $\mu$ L IP Elution Buffer (1% SDS, 0.1 M NaHCO<sub>3</sub>) and incubated at 65°C in a Thermomixer  
616 (Eppendorf) with interval mixing to dissociate antibodies from chromatin. Beads were separated  
617 from chromatin by centrifugation, Proteinase K was added to the supernatant and crosslinks were  
618 reversed at 65°C for ~16 hours. Input samples (100  $\mu$ L) were mixed with an equal volume of IP  
619 Elution Buffer, Proteinase K was added and cross-links were reversed together with the ChIP  
620 samples. DNA was purified by phenol-chloroform-isoamyl extraction followed by MinElute column  
621 (Qiagen) clean up. DNA concentration was measured using QuBIT, and libraries were generated  
622 using the NEBNext Ultra II DNA Library Prep Kit for Illumina (NEB, E7645S). Libraries were  
623 sequenced on a NextSeq (Illumina) in a 2x75 bp format.

624

### 625 **ChIP-seq data processing**

626 Demultiplexed fastq files were initially mapped to the hg19 assembly of the human genome  
627 (female version) as 1x36mers using Bowtie v1.0.1<sup>94</sup> with the following settings: '-v 2 -k 2 -m 1 --  
628 best --strata', for quality assessment purposes (see AQUAS:  
629 [https://github.com/kundajelab/chipseq\\_pipeline](https://github.com/kundajelab/chipseq_pipeline)) (**Supplementary Table 3**). For subsequent  
630 analyses of CTCF occupancy, reads were mapped against the female version of the hg19  
631 assembly of the human genome using the 'bwa mem' algorithm in the BWA aligner with default  
632 settings and filtering non-unique and low-quality alignments using samtools<sup>85</sup> with the '-F 180 -q  
633 30' options. A consensus set of peaks was derived from the three "safe" sgRNA CTCF ChIP-seq  
634 datasets as described in the AQUAS pipeline. FRiP values<sup>95</sup> were calculated for each dataset

635 using this set of peak calls. Read coverage tracks were generated using custom-written Python  
636 scripts. For the purpose of comparison between datasets and normalizing for differences in ChIP  
637 strength between individual experiments, tracks were rescaled as follows:

$$638 \quad C_{chr,i}^*(D) = C_{chr,i}(D) * \frac{\max_D(FRIP)}{FRIP_D}$$

639 Where  $C_{chr,i}(D)$  is the normalized coverage (in RPM, or Read Per Million mapped reads units) of  
640 position  $i$  on a given chromosome  $chr$  in dataset  $D$ , and  $C_{chr,i}^*(D)$  is the rescaled coverage.

641

## 642 **RNA-seq data processing and analysis**

643 Paired-end 2x100 bp PolyA+ and Total RNA-seq reads were mapped using version 2.5.3a of the  
644 STAR aligner<sup>96</sup> against the hg19 version of the human genome with haplotypes removed but  
645 retaining random chromosomes, with version 19 of the GENCODE annotation<sup>84</sup> as a reference.  
646 Gene expression quantification was then carried out on the STAR alignments transformed into  
647 transcriptome space using version 1.3.0 of RSEM<sup>97</sup>. Differential expression analysis was  
648 performed using DESeq2<sup>98</sup> with the RSEM estimated read counts per gene as an input. Mapping  
649 and QC statistics are provided in **Supplementary Table 4**.

650

## 651 **ATAC-seq experiments**

652 ATAC-seq experiments were carried out following the Omni-ATAC-seq protocol as previously  
653 described<sup>99</sup>, using 50,000 K562 cells per biological replicate and two replicates per sgRNA.

654

## 655 **ATAC-seq analysis**

656 Paired-end 2x36 bp reads were first mapped to the mitochondrial genome to assess the fraction  
657 of mitochondrial reads in each sample. All other reads were then mapped to the hg19 genome  
658 assembly using BWA as described above. Statistics are summarized in **Supplementary Table**  
659 **5**.

660

### 661 **ICE analysis of indels**

662 Cells were harvested and total genomic DNA was isolated using QuickExtract DNA Extraction  
663 Solution (VWR, Radnor, PA, cat# QE09050). PCR was prepared using 5X GoTaq Green Reaction  
664 Buffer and GoTaq DNA Polymerase (Promega, Madison, WI, cat# M3005), 10 mM dNTPs, and  
665 primers designed approximately 250-350 basepairs upstream and 450-600 basepairs  
666 downstream of the predicted cut site. PCR reactions were run on a C1000 Touch Thermo Cycler  
667 (Bio-Rad). PCR products were then purified over an Econospin DNA column (Epoch, Missouri  
668 City, TX, cat# 1910-250) using Buffers PB and PE (Qiagen, Hilden, Germany, cat# 19066 and  
669 cat# 19065). Sanger sequencing ab1 data were obtained from Quintara Biosciences and editing  
670 efficiency of knockout cell lines were analyzed using Synthego's online ICE Analysis Tool  
671 (<https://ice.synthego.com>)<sup>81</sup>.

672

### 673 **RT-qPCR experiments**

674 RNA from 100,000 K562 cells was extracted with RNA QuickExtract (Lucigen QER090150). RNA  
675 was treated with DNaseI from the same kit, reverse transcribed with AMV RT (Sigma  
676 10109118001), and then cDNA were quantified in multiplex TaqMan qPCR reactions using  
677 commercially available probe sets (Thermo Fisher 4453320) and TaqMan FastAdvanced Master  
678 mix (Thermo Fisher 4444556). 3 to 4 technical qPCR replicates were used for each biological  
679 replicate.

680

### 681 **Flow cytometry for GATA1 protein levels**

682 We devised a flow cytometry assay wherein we co-culture cells expressing the sgRNA and  
683 mCherry from a lentivirus with non-transduced cells and stain for *GATA1* protein. Staining of  
684 *GATA1* protein levels was performed as previously described<sup>100</sup>. Specifically, cells were fixed  
685 with Fix Buffer I (BD Biosciences) for 15 minutes at 37°C. Cells were washed with 10% FBS in



686 PBS once and then permeabilized on ice for 30 min using Perm Buffer III (BD Biosciences). Cells  
687 were washed twice and then stained with anti-GATA1 primary (1:1000, rabbit, Cell Signalling  
688 Technologies cat no. 3535S) for 1 hour at 4°C. After two more washes, cells were incubated with  
689 Goat anti-rabbit antibody conjugated to Alexa Fluor 647 (1:1000, ThermoFisher cat no. A-21244)  
690 for 1 hour at 4°C. After a final round of washing, flow cytometry was performed using a FACScan  
691 flow cytometer (BD Biosciences). We analyzed the data with CytoFlow by gating the cells on  
692 mCherry expression and then plot the *GATA1* protein level in mCherry+ and non-transduced cells.  
693 This approach controls for variability in staining efficiency as the two cell groups are mixed within  
694 the same sample.

695

#### 696 **Western blot for GATA1 protein levels**

697 Cells transduced with a lentiviral vector containing an sgRNA and puromycin-T2A-mCherry were  
698 selected with puromycin (1µg/mL) were selected until mCherry was > 85%. 1 million cells were  
699 lysed in lysis buffer (1% Triton X-100, 150mM NaCl, 50mM Tris pH 7.5, 1mM EDTA, Protease  
700 inhibitor cocktail). Protein amounts were quantified using the DC Protein Assay kit (Bio-Rad).  
701 Equal amounts were loaded onto a gel and transferred to a nitrocellulose membrane. Membrane  
702 was probed using GATA1 antibody (1:1000, rabbit, Cell Signalling Technologies cat no. 3535S)  
703 and GAPDH antibody (1:2000, mouse, ThermoFisher cat no. AM4300) as primary antibodies.  
704 Donkey anti-rabbit IRDye 680 LT and goat anti-mouse IRDye 800CW (1:20,000 dilution, LI-COR  
705 Biosciences, cat nos. 926-68023 and 926-32210, respectively) were used as secondary  
706 antibodies. Blots were imaged on a LiCor Odyssey CLx.

707

#### 708 **Data availability**

709 We will submit the following datasets to accessible online repositories: CRISPR-Cas9 screen data  
710 (tiling screens, fine-mapping screen, CTCF motif screens), CTCF ChIP-seq.

711

712 **Acknowledgments**

713 We thank Evan Boyle, Maxwell Mumbach, Avanti Shrikumar, Kyuho Han, and Nasa Sinnott-  
714 Armstrong for helpful conversations and assistance. We thank Christina Leslie, Yuri Pritykin,  
715 Andrea Ventura and other members of the Leslie lab for helpful conversations about GuideScan.  
716 We thank the Stanford Functional Genomics Facility for sequencing ATAC-seq libraries. J.T. is  
717 supported by the NSF GRFP. M.C.B. is supported by a grant from Stanford ChEM-H and an NIH  
718 Director's New Innovator Award (1DP2HD08406901). O.U. is supported by a Howard Hughes  
719 Medical Institute International Student Research Fellowship and a Gabilan Stanford Graduate  
720 Fellowship. D.H.P. was supported by NIGMS and NHGRI of the NIH under award numbers  
721 R35GM128645 and R00HG008662 respectively. This work was supported by a grant from  
722 NIH/ENCODE 5UM1HG009436-02 to W.J.G., A.K., and M.C.B.

723

724 **Author contributions**

725 M.W. and O.U. designed sgRNA libraries with assistance from J.T., D.M., I.M.K., P.G.G., D.H.P.,  
726 and M.C.B. J.T., G.K.M, G.T.H., B.K.E., A.T., A. and A.E.T. performed experiments. J.T., M.W.,  
727 G.K.M., O.U. and G.T.H. analyzed data with assistance from D.M., I.M.K., L.B., W.J.G., A.K., and  
728 M.C.B. G.K.M. analyzed scores for guides targeting motifs and ENCODE SCREEN elements.  
729 D.Y., K.S., A.L., and A.T. generated sgRNA libraries. J.T., M.W., and G.K.M. wrote the manuscript  
730 with contributions from all authors. M.P.S., L.B., W.J.G., A.K., and M.C.B. supervised the project.

731

732 **Competing interests statement**

733 The authors declare no competing interests.

734

## 735 **References**

- 736 1. Wang, T., Wei, J. J., Sabatini, D. M. & Lander, E. S. Genetic screens in human cells using  
737 the CRISPR-Cas9 system. *Science* **343**, 80–84 (2014).
- 738 2. Shalem, O. *et al.* Genome-Scale CRISPR-Cas9 Knockout Screening in Human Cells.  
739 *Science* **343**, 84–87 (2014).
- 740 3. Gilbert, L. A. *et al.* Genome-Scale CRISPR-Mediated Control of Gene Repression and  
741 Activation. *Cell* **159**, 647–661 (2014).
- 742 4. Zhou, Y. *et al.* High-throughput screening of a CRISPR/Cas9 library for functional genomics  
743 in human cells. *Nature* **509**, 487–491 (2014).
- 744 5. Koike-Yusa, H., Li, Y., Tan, E.-P., Velasco-Herrera, M. D. C. & Yusa, K. Genome-wide  
745 recessive genetic screening in mammalian cells with a lentiviral CRISPR-guide RNA library.  
746 *Nat. Biotechnol.* **32**, 267–273 (2014).
- 747 6. Doench, J. G. *et al.* Rational design of highly active sgRNAs for CRISPR-Cas9-mediated  
748 gene inactivation. *Nat. Biotechnol.* **32**, 1262–1267 (2014).
- 749 7. Morgens, D. W., Deans, R. M., Li, A. & Bassik, M. C. Systematic comparison of  
750 CRISPR/Cas9 and RNAi screens for essential genes. *Nat. Biotechnol.* **34**, 634–636 (2016).
- 751 8. Tsherniak, A. *et al.* Defining a Cancer Dependency Map. *Cell* **170**, 564–576.e16 (2017).
- 752 9. Fulco, C. P. *et al.* Systematic mapping of functional enhancer–promoter connections with  
753 CRISPR interference. *Science* **354**, 769–773 (2016).
- 754 10. Sanjana, N. E. *et al.* High-resolution interrogation of functional elements in the noncoding  
755 genome. *Science* **353**, 1545–1549 (2016).
- 756 11. Joung, J. *et al.* Genome-scale activation screen identifies a lncRNA locus regulating a gene  
757 neighbourhood. *Nature* (2017). doi:10.1038/nature23451
- 758 12. Korkmaz, G. *et al.* Functional genetic screens for enhancer elements in the human genome  
759 using CRISPR-Cas9. *Nat. Biotechnol.* **34**, 192–198 (2016).

- 760 13. Gasperini, M. *et al.* CRISPR/Cas9-Mediated Scanning for Regulatory Elements Required for  
761 HPRT1 Expression via Thousands of Large, Programmed Genomic Deletions. *Am. J. Hum.*  
762 *Genet.* **101**, 192–205 (2017).
- 763 14. Klann, T. S. *et al.* CRISPR–Cas9 epigenome editing enables high-throughput screening for  
764 functional regulatory elements in the human genome. *Nat. Biotechnol.* **35**, 561–568 (2017).
- 765 15. Simeonov, D. R. *et al.* Discovery of stimulation-responsive immune enhancers with CRISPR  
766 activation. *Nature* (2017). doi:10.1038/nature23875
- 767 16. Canver, M. C. *et al.* Variant-aware saturating mutagenesis using multiple Cas9 nucleases  
768 identifies regulatory elements at trait-associated loci. *Nat. Genet.* **49**, 625–634 (2017).
- 769 17. Zhu, S. *et al.* Genome-scale deletion screening of human long non-coding RNAs using a  
770 paired-guide RNA CRISPR-Cas9 library. *Nat. Biotechnol.* **34**, 1279–1286 (2016).
- 771 18. Liu, Y. *et al.* Genome-wide screening for functional long noncoding RNAs in human cells by  
772 Cas9 targeting of splice sites. *Nat. Biotechnol.* **36**, 1203 (2018).
- 773 19. Canver, M. C. *et al.* BCL11A enhancer dissection by Cas9-mediated in situ saturating  
774 mutagenesis. *Nature* **527**, 192–197 (2015).
- 775 20. Liu, S. J. *et al.* CRISPRi-based genome-scale identification of functional long noncoding RNA  
776 loci in human cells. *Science* **355**, eaah7111 (2017).
- 777 21. Thakore, P. I. *et al.* Highly specific epigenome editing by CRISPR-Cas9 repressors for  
778 silencing of distal regulatory elements. *Nat. Methods* **12**, 1143–1149 (2015).
- 779 22. Hilton, I. B. *et al.* Epigenome editing by a CRISPR-Cas9-based acetyltransferase activates  
780 genes from promoters and enhancers. *Nat. Biotechnol.* **33**, 510–517 (2015).
- 781 23. Gilbert, L. A. *et al.* CRISPR-mediated modular RNA-guided regulation of transcription in  
782 eukaryotes. *Cell* **154**, 442–451 (2013).
- 783 24. Konermann, S. *et al.* Genome-scale transcriptional activation by an engineered CRISPR-  
784 Cas9 complex. *Nature* **517**, 583–588 (2014).
- 785 25. Hsu, P. D. *et al.* DNA targeting specificity of RNA-guided Cas9 nucleases. *Nat. Biotechnol.*

- 786           **31**, 827–832 (2013).
- 787   26. Pattanayak, V. *et al.* High-throughput profiling of off-target DNA cleavage reveals RNA-  
788           programmed Cas9 nuclease specificity. *Nat. Biotechnol.* **31**, 839–843 (2013).
- 789   27. Tsai, S. Q. *et al.* GUIDE-seq enables genome-wide profiling of off-target cleavage by  
790           CRISPR-Cas nucleases. *Nat. Biotechnol.* **33**, 187–198 (2015).
- 791   28. Tycko, J., Myer, V. E. & Hsu, P. D. Methods for Optimizing CRISPR-Cas9 Genome Editing  
792           Specificity. *Mol. Cell* **63**, 355–370 (2016).
- 793   29. Tsai, S. Q. & Joung, J. K. Defining and improving the genome-wide specificities of CRISPR-  
794           Cas9 nucleases. *Nat. Rev. Genet.* **17**, 300–312 (2016).
- 795   30. Aguirre, A. J. *et al.* Genomic Copy Number Dictates a Gene-Independent Cell Response to  
796           CRISPR/Cas9 Targeting. *Cancer Discov.* **6**, 914–929 (2016).
- 797   31. Munoz, D. M. *et al.* CRISPR Screens Provide a Comprehensive Assessment of Cancer  
798           Vulnerabilities but Generate False-Positive Hits for Highly Amplified Genomic Regions.  
799           *Cancer Discov.* **6**, 900–913 (2016).
- 800   32. Meyers, R. M. *et al.* Computational correction of copy number effect improves specificity of  
801           CRISPR-Cas9 essentiality screens in cancer cells. *Nat. Genet.* **49**, 1779–1784 (2017).
- 802   33. Wang, T. *et al.* Identification and characterization of essential genes in the human genome.  
803           *Science* **350**, 1096–1101 (2015).
- 804   34. Morgens, D. W. *et al.* Genome-scale measurement of off-target activity using Cas9 toxicity  
805           in high-throughput screens. *Nat. Commun.* **8**, 15178 (2017).
- 806   35. Fortin, J.-P. *et al.* Multiple-gene targeting and mismatch tolerance can confound analysis of  
807           genome-wide pooled CRISPR screens. *bioRxiv* 387258 (2018). doi:10.1101/387258
- 808   36. Doench, J. G. *et al.* Optimized sgRNA design to maximize activity and minimize off-target  
809           effects of CRISPR-Cas9. *Nat. Biotechnol.* **34**, 184–191 (2016).
- 810   37. Perez, A. R. *et al.* GuideScan software for improved single and paired CRISPR guide RNA  
811           design. *Nat. Biotechnol.* **35**, 347–349 (2017).

- 812 38. Sanson, K. R. *et al.* Up, down, and out: next generation libraries for genome-wide CRISPRa,  
813 CRISPRi, and CRISPR-Cas9 knockout genetic screens. *bioRxiv* 356626 (2018).  
814 doi:10.1101/356626
- 815 39. Dixon, J. R. *et al.* Topological domains in mammalian genomes identified by analysis of  
816 chromatin interactions. *Nature* **485**, 376–380 (2012).
- 817 40. Rao, S. S. P. *et al.* A 3D map of the human genome at kilobase resolution reveals principles  
818 of chromatin looping. *Cell* **159**, 1665–1680 (2014).
- 819 41. Sanborn, A. L. *et al.* Chromatin extrusion explains key features of loop and domain formation  
820 in wild-type and engineered genomes. *Proc. Natl. Acad. Sci. U. S. A.* **112**, E6456–65 (2015).
- 821 42. Nichols, M. H. & Corces, V. G. A CTCF Code for 3D Genome Architecture. *Cell* **162**, 703–  
822 705 (2015).
- 823 43. Guo, Y. *et al.* CRISPR Inversion of CTCF Sites Alters Genome Topology and  
824 Enhancer/Promoter Function. *Cell* **162**, 900–910 (2015).
- 825 44. Hanssen, L. L. P. *et al.* Tissue-specific CTCF–cohesin-mediated chromatin architecture  
826 delimits enhancer interactions and function in vivo. *Nat. Cell Biol.* **19**, 952 (2017).
- 827 45. Guo, Y. *et al.* CRISPR-mediated deletion of prostate cancer risk-associated CTCF loop  
828 anchors identifies repressive chromatin loops. *Genome Biol.* **19**, 160 (2018).
- 829 46. Lupiáñez, D. G. *et al.* Disruptions of topological chromatin domains cause pathogenic  
830 rewiring of gene-enhancer interactions. *Cell* **161**, 1012–1025 (2015).
- 831 47. Katainen, R. *et al.* CTCF/cohesin-binding sites are frequently mutated in cancer. *Nat. Genet.*  
832 **47**, 818–821 (2015).
- 833 48. Flavahan, W. A. *et al.* Insulator dysfunction and oncogene activation in IDH mutant gliomas.  
834 *Nature* **529**, 110–114 (2016).
- 835 49. Hnisz, D. *et al.* Activation of proto-oncogenes by disruption of chromosome neighborhoods.  
836 *Science* **351**, 1454–1458 (2016).
- 837 50. Nora, E. P. *et al.* Targeted Degradation of CTCF Decouples Local Insulation of Chromosome

- 838 Domains from Genomic Compartmentalization. *Cell* **169**, 930–944.e22 (2017).
- 839 51. Roadmap Epigenomics Consortium *et al.* Integrative analysis of 111 reference human  
840 epigenomes. *Nature* **518**, 317–330 (2015).
- 841 52. Horlbeck, M. A. *et al.* Compact and highly active next-generation libraries for CRISPR-  
842 mediated gene repression and activation. *Elife* **5**, (2016).
- 843 53. Haeussler, M. *et al.* Evaluation of off-target and on-target scoring algorithms and integration  
844 into the guide RNA selection tool CRISPOR. *Genome Biol.* **17**, 148 (2016).
- 845 54. Tycko, J. *et al.* Pairwise library screen systematically interrogates *Staphylococcus aureus*  
846 Cas9 specificity in human cells. *Nat. Commun.* **9**, 2962 (2018).
- 847 55. Listgarten, J. *et al.* Prediction of off-target activities for the end-to-end design of CRISPR  
848 guide RNAs. *Nat Biomed Eng* **2**, 38–47 (2018).
- 849 56. Ernst, J. & Kellis, M. ChromHMM: automating chromatin-state discovery and  
850 characterization. *Nat. Methods* **9**, 215–216 (2012).
- 851 57. Tanenbaum, M. E., Gilbert, L. A., Qi, L. S., Weissman, J. S. & Vale, R. D. A protein-tagging  
852 system for signal amplification in gene expression and fluorescence imaging. *Cell* **159**, 635–  
853 646 (2014).
- 854 58. Lawhorn, I. E. B., Ferreira, J. P. & Wang, C. L. Evaluation of sgRNA target sites for CRISPR-  
855 mediated repression of TP53. *PLoS One* **9**, e113232 (2014).
- 856 59. Yeo, N. C. *et al.* An enhanced CRISPR repressor for targeted mammalian gene regulation.  
857 *Nat. Methods* **15**, 611–616 (2018).
- 858 60. Dunham, I. *et al.* An integrated encyclopedia of DNA elements in the human genome. *Nature*  
859 **489**, 57–74 (2012).
- 860 61. ENCODE Project Consortium. A user's guide to the encyclopedia of DNA elements  
861 (ENCODE). *PLoS Biol.* **9**, e1001046 (2011).
- 862 62. Liu, Z., Scannell, D. R., Eisen, M. B. & Tjian, R. Control of embryonic stem cell lineage  
863 commitment by core promoter factor, TAF3. *Cell* **146**, 720–731 (2011).

- 864 63. Ong, C.-T. & Corces, V. G. CTCF : an architectural protein bridging genome topology and  
865 function. *Nature Publishing Group* **15**, (2014).
- 866 64. Kim, Y. J., Cecchini, K. R. & Kim, T. H. Conserved, developmentally regulated mechanism  
867 couples chromosomal looping and heterochromatin barrier activity at the homeobox gene A  
868 locus. *Proc. Natl. Acad. Sci. U. S. A.* **108**, 7391–7396 (2011).
- 869 65. Narendra, V. *et al.* CTCF establishes discrete functional chromatin domains at the Hox  
870 clusters during differentiation. *Science* **347**, 1017–1021 (2015).
- 871 66. Xie, S., Duan, J., Li, B., Zhou, P. & Hon, G. C. Multiplexed Engineering and Analysis of  
872 Combinatorial Enhancer Activity in Single Cells. *Mol. Cell* **66**, 285–299.e5 (2017).
- 873 67. Dixit, A. *et al.* Perturb-Seq: Dissecting Molecular Circuits with Scalable Single-Cell RNA  
874 Profiling of Pooled Genetic Screens. *Cell* **167**, 1853–1866.e17 (2016).
- 875 68. Datlinger, P. *et al.* Pooled CRISPR screening with single-cell transcriptome readout. *Nat.*  
876 *Methods* **14**, 297–301 (2017).
- 877 69. Hill, A. J. *et al.* On the design of CRISPR-based single-cell molecular screens. *Nat. Methods*  
878 **15**, 271–274 (2018).
- 879 70. Adamson, B. *et al.* A Multiplexed Single-Cell CRISPR Screening Platform Enables  
880 Systematic Dissection of the Unfolded Protein Response. *Cell* **167**, 1867–1882.e21 (2016).
- 881 71. Rubin, A. J. *et al.* Coupled single-cell CRISPR screening and epigenomic profiling reveals  
882 causal gene regulatory networks. *bioRxiv* (2018).
- 883 72. Fu, Y., Sander, J. D., Reyon, D., Cascio, V. M. & Joung, J. K. Improving CRISPR-Cas  
884 nuclease specificity using truncated guide RNAs. *Nat. Biotechnol.* **32**, 279–284 (2014).
- 885 73. Kleinstiver, B. P. *et al.* High-fidelity CRISPR-Cas9 nucleases with no detectable genome-  
886 wide off-target effects. *Nature* **529**, 490–495 (2016).
- 887 74. Slaymaker, I. M. *et al.* Rationally engineered Cas9 nucleases with improved specificity.  
888 *Science* **351**, 84–88 (2016).
- 889 75. Chen, J. S. *et al.* Enhanced proofreading governs CRISPR-Cas9 targeting accuracy. *Nature*



- 890           **550**, 407–410 (2017).
- 891   76. Vakulskas, C. A. *et al.* A high-fidelity Cas9 mutant delivered as a ribonucleoprotein complex  
892       enables efficient gene editing in human hematopoietic stem and progenitor cells. *Nat. Med.*  
893       **24**, 1216–1224 (2018).
- 894   77. Zetsche, B. *et al.* Cpf1 is a single RNA-guided endonuclease of a class 2 CRISPR-Cas  
895       system. *Cell* **163**, 759–771 (2015).
- 896   78. Hu, J. H. *et al.* Evolved Cas9 variants with broad PAM compatibility and high DNA specificity.  
897       *Nature* **556**, 57–63 (2018).
- 898   79. Kleinstiver, B. P. *et al.* Engineered CRISPR-Cas9 nucleases with altered PAM specificities.  
899       *Nature* **523**, 481–485 (2015).
- 900   80. Bae, S., Park, J. & Kim, J.-S. Cas-OFFinder: a fast and versatile algorithm that searches for  
901       potential off-target sites of Cas9 RNA-guided endonucleases. *Bioinformatics* **30**, 1473–1475  
902       (2014).
- 903   81. Hsiao, T. *et al.* Inference of CRISPR Edits from Sanger Trace Data. *bioRxiv* 251082 (2018).  
904       doi:10.1101/251082
- 905   82. Brinkman, E. K., Chen, T., Amendola, M. & van Steensel, B. Easy quantitative assessment  
906       of genome editing by sequence trace decomposition. *Nucleic Acids Res.* **42**, e168 (2014).
- 907   83. Schones, D. E., Smith, A. D. & Zhang, M. Q. Statistical significance of cis-regulatory modules.  
908       *BMC Bioinformatics* **8**, 19 (2007).
- 909   84. Harrow, J. *et al.* GENCODE: the reference human genome annotation for The ENCODE  
910       Project. *Genome Res.* **22**, 1760–1774 (2012).
- 911   85. Li, H. & Durbin, R. Fast and accurate short read alignment with Burrows–Wheeler transform.  
912       *Bioinformatics* **25**, 1754–1760 (2009).
- 913   86. Bassik, M. C. *et al.* A systematic mammalian genetic interaction map reveals pathways  
914       underlying ricin susceptibility. *Cell* **152**, 909–922 (2013).
- 915   87. Kampmann, M., Bassik, M. C. & Weissman, J. S. Integrated platform for genome-wide

- 916 screening and construction of high-density genetic interaction maps in mammalian cells.  
917 *Proc. Natl. Acad. Sci. U. S. A.* **110**, E2317–26 (2013).
- 918 88. Deans, R. M. *et al.* Parallel shRNA and CRISPR-Cas9 screens enable antiviral drug target  
919 identification. *Nat. Chem. Biol.* **12**, 361–366 (2016).
- 920 89. Grant, C. E., Bailey, T. L. & Noble, W. S. FIMO: scanning for occurrences of a given motif.  
921 *Bioinformatics* **27**, 1017–1018 (2011).
- 922 90. Bailey, T. L. *et al.* MEME SUITE: tools for motif discovery and searching. *Nucleic Acids Res.*  
923 **37**, W202–8 (2009).
- 924 91. Weirauch, M. T. *et al.* Determination and inference of eukaryotic transcription factor  
925 sequence specificity. *Cell* **158**, 1431–1443 (2014).
- 926 92. Zhou, X. & Wang, T. Using the Wash U Epigenome Browser to examine genome-wide  
927 sequencing data. *Curr. Protoc. Bioinformatics* **40**, 10–10 (2012).
- 928 93. Marinov, G. K. ChIP-seq for the Identification of Functional Elements in the Human Genome.  
929 *Methods Mol. Biol.* **1543**, 3–18 (2017).
- 930 94. Langmead, B., Trapnell, C., Pop, M. & Salzberg, S. L. Ultrafast and memory-efficient  
931 alignment of short DNA sequences to the human genome. *Genome Biol.* **10**, R25 (2009).
- 932 95. Landt, S. G. *et al.* ChIP-seq guidelines and practices of the ENCODE and modENCODE  
933 consortia. *Genome Res.* **22**, 1813–1831 (2012).
- 934 96. Dobin, A. *et al.* STAR: ultrafast universal RNA-seq aligner. *Bioinformatics* **29**, 15–21 (2013).
- 935 97. Li, B. & Dewey, C. N. RSEM: accurate transcript quantification from RNA-Seq data with or  
936 without a reference genome. *BMC Bioinformatics* **12**, 323 (2011).
- 937 98. Love, M. I., Huber, W. & Anders, S. Moderated estimation of fold change and dispersion for  
938 RNA-seq data with DESeq2. *Genome Biol.* **15**, 550 (2014).
- 939 99. Corces, M. R. *et al.* An improved ATAC-seq protocol reduces background and enables  
940 interrogation of frozen tissues. *Nat. Methods* **14**, 959–962 (2017).
- 941 100. Brockmann, M. *et al.* Genetic wiring maps of single-cell protein states reveal an off-switch for

- 942 GPCR signalling. *Nature* **546**, 307–311 (2017).
- 943 101. Shrikumar, A., Greenside, P. & Kundaje, A. Reverse-complement parameter sharing  
944 improves deep learning models for genomics. *bioRxiv* 103663 (2017). doi:10.1101/103663
- 945 102. Mathelier, A. *et al.* JASPAR 2016: a major expansion and update of the open-access  
946 database of transcription factor binding profiles. *Nucleic Acids Res.* **44**, D110–5 (2016).
- 947 103. Tang, Z. *et al.* CTCF-Mediated Human 3D Genome Architecture Reveals Chromatin  
948 Topology for Transcription. *Cell* **163**, 1611–1627 (2015).
- 949 104. Alipanahi, B., Delong, A., Weirauch, M. T. & Frey, B. J. Predicting the sequence specificities  
950 of DNA- and RNA-binding proteins by deep learning. *Nat. Biotechnol.* **33**, 831–838 (2015).
- 951 105. Kelley, D. R., Snoek, J. & Rinn, J. L. Basset: learning the regulatory code of the accessible  
952 genome with deep convolutional neural networks. *Genome Res.* **26**, 990–999 (2016).
- 953 106. Chollet, F. & Others. Keras. (2015).
- 954 107. He, K., Zhang, X., Ren, S. & Sun, J. Delving Deep into Rectifiers: Surpassing Human-Level  
955 Performance on ImageNet Classification. *arXiv [cs.CV]* (2015).
- 956

957 **Figures**

**FIGURE 1**

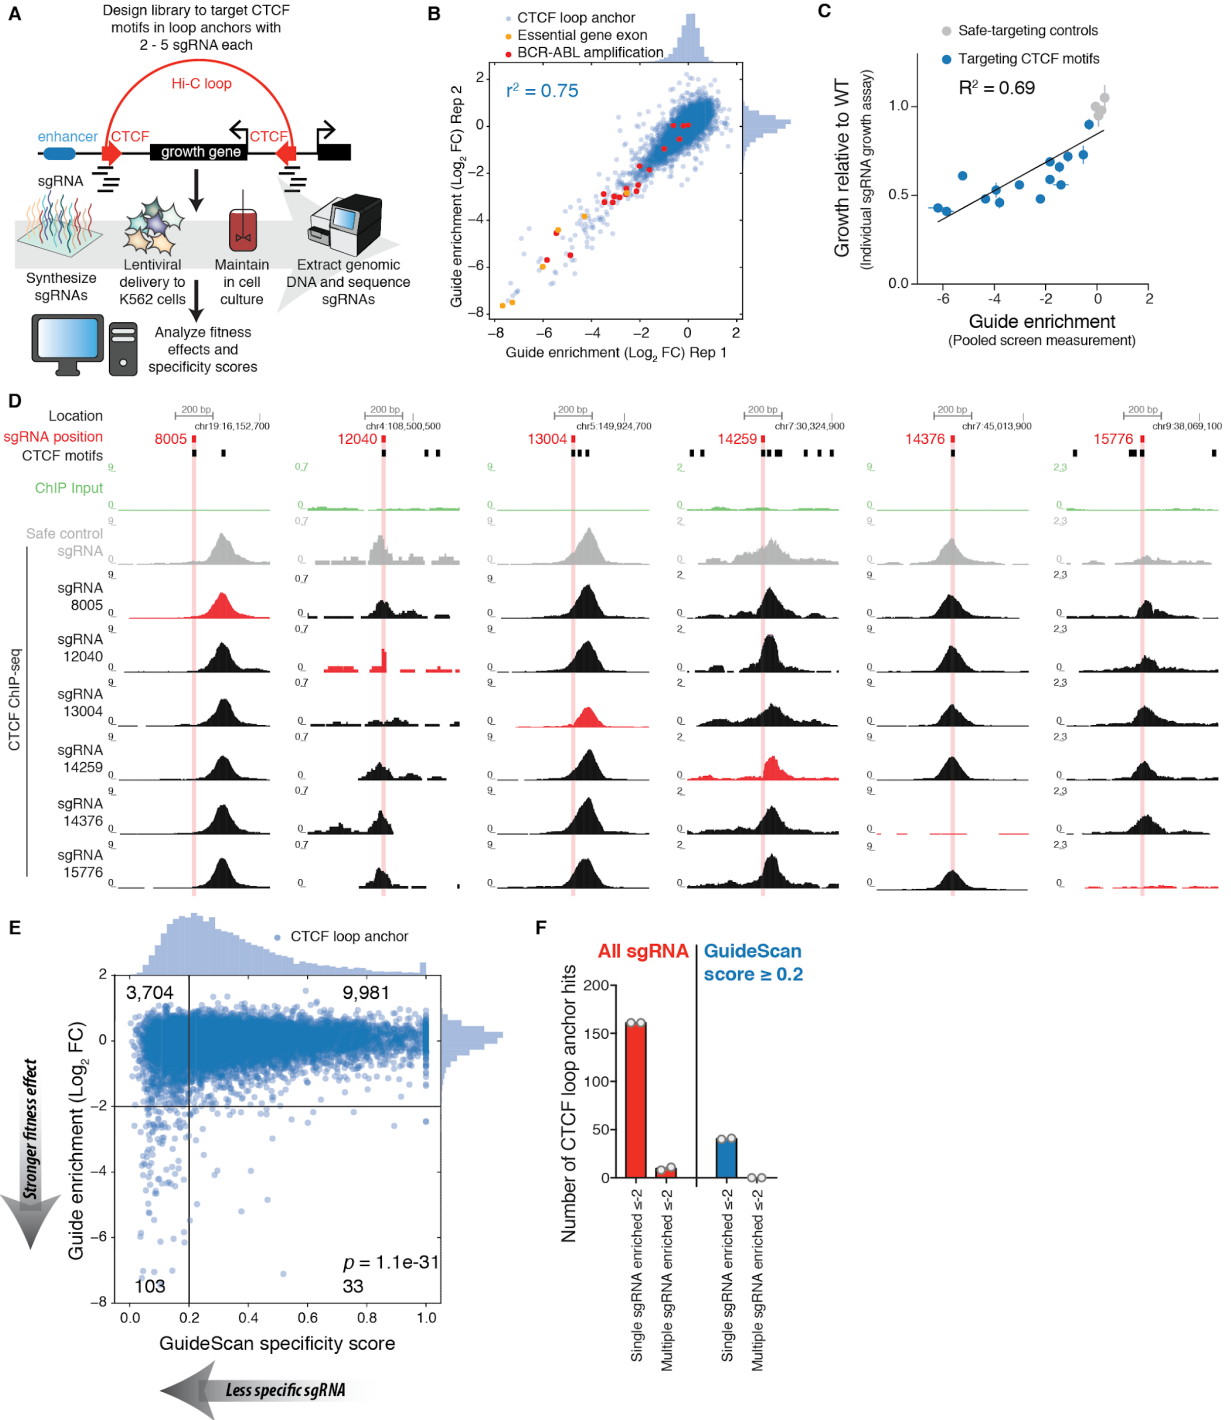

958

959

960 **Figure 1. A genome-scale CRISPR-Cas9 screen finds no essential CTCF loop anchors,.**

- 961 A. Schematic of CTCF loop anchor motif screen, with 2 to 5 sgRNAs targeting each CTCF motif.
- 962 B. Fitness effects are reproducible between independently transduced biological replicates of the screen. sgRNAs targeting
- 963 essential gene exons or the BCR-ABL amplification drop out during the growth screen, as expected. Guide enrichment
- 964 values are the  $\log_2(\text{fold-change})$  of an sgRNA's sequencing counts from after the screen compared with the original plasmid
- 965 pool, computed with the casTLE screen analysis software <sup>7</sup>.
- 966 C. The growth effects of CTCF motif-targeting sgRNA are validated in individual competitive growth assays after lentiviral
- 967 delivery of single guides to K562-Cas9 cells. Error bars are standard deviation of three technical replicates.
- 968 D. CTCF ChIP-seq was performed on the K562 cells stably expressing a CTCF-targeting sgRNA. Each column presents a
- 969 particular CTCF ChIP peak and the red track highlights the sgRNA that has an on-target match in that column. While some
- 970 sgRNAs completely ablate CTCF binding, others only remove part of a compound CTCF ChIP peak. sgRNA 8005 targets
- 971 a motif that was not in fact underlying the nearest ChIP-seq peak, likely due to problems with motif annotation or differences
- 972 between K562 cell lines, yet this guide still confers a validated growth phenotype.
- 973 E. Low-specificity guides are significantly enriched among CTCF motif-targeting guides with fitness effects. The Fisher's exact
- 974 test provided the p-value for the association between fitness effect and specificity using the 2x2 contingency table of the
- 975 numbers of guides in each quadrant based on the thresholds drawn in black lines. Numbers in corners correspond to the
- 976 number of CTCF site-targeting guides (blue circles) in the quadrant. The off-target search was done with GuideScan, which
- 977 retrieves all off-target locations with 2 or 3 mismatches to the sgRNA spacer. sgRNAs with > 1 perfect matches to the
- 978 genome or > 0 off-target locations with only 1 mismatch are not searchable within the GuideScan trie data structure and
- 979 were excluded from this analysis.
- 980 F. There were no CTCF motifs with concordant evidence of fitness effects from multiple high-specificity sgRNAs. Grey circles
- 981 are screen biological replicates.

## FIGURE 2

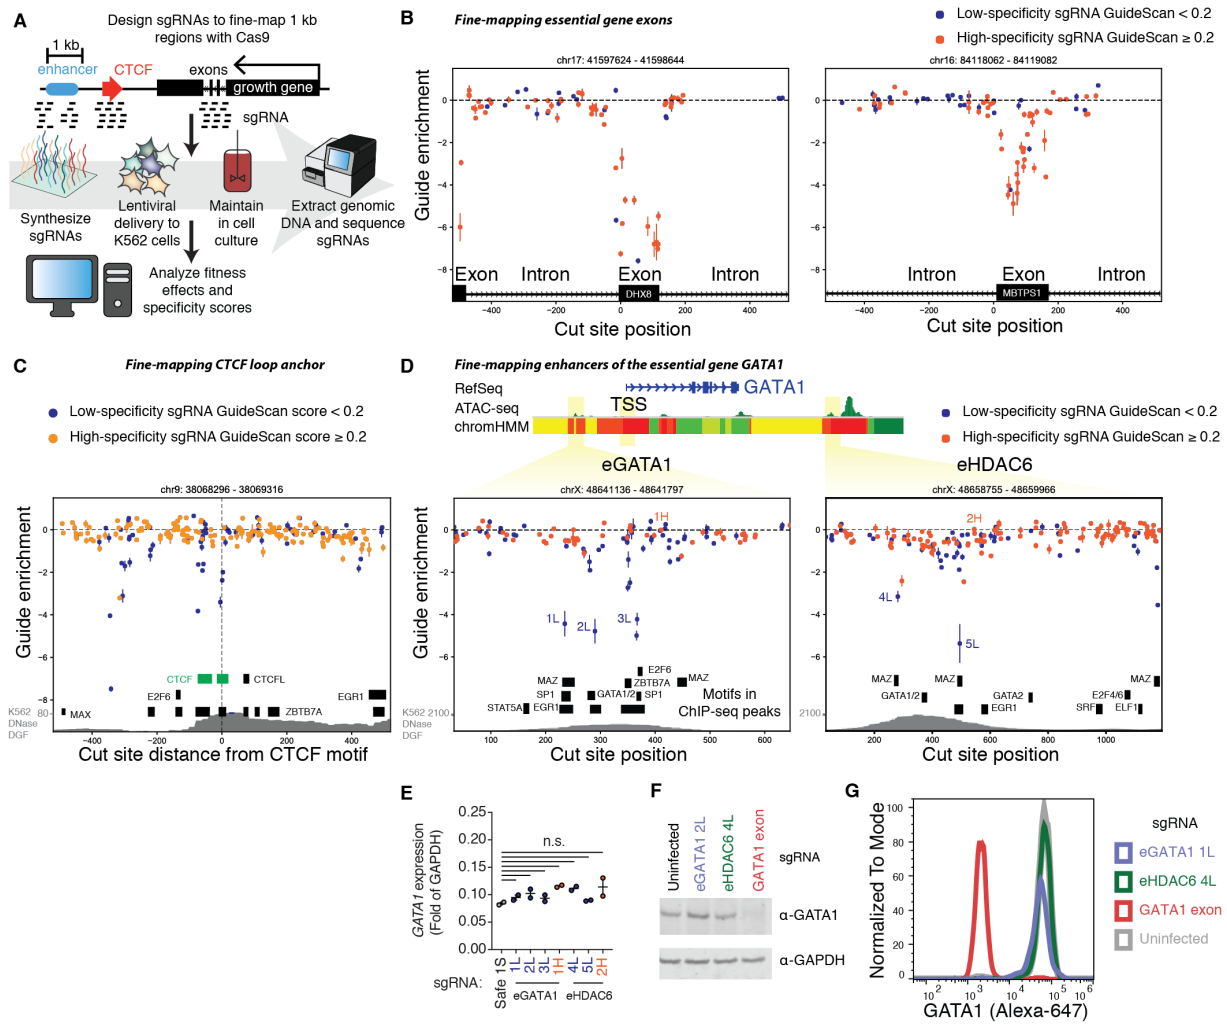

982

983

984 **Figure 2. Low-specificity sgRNAs confound identification of essential motifs in fine-mapping screen**  
985 **of loop anchors and enhancers of essential genes.**

- 986 A. A fine-mapping Cas9 growth screen was performed with sgRNAs densely tiling two types of regions: 1) 1 kb windows around  
987 select hit and non-hit CTCF loop anchors from the CTCF motif screen and 2) two enhancers of *GATA1*, previously called  
988 eGATA1 and eHDAC6.
- 989 B. As a positive control, we verified that the fine-mapping screen correctly maps the boundaries of exons of essential genes  
990 with high-specificity sgRNAs. Each point is the average enrichment of two biological replicates and the error bar is the  
991 standard error.
- 992 C. Fine-mapping screen results from a 1 kb region centered on a motif that was a false positive hit in the original motif-targeting  
993 screen (targeted with sgRNAs 15776 and 15777 and also shown in **Figure 1** and **Supplementary Figure 1**). All evidence  
994 for the essentiality of a CTCF motif comes from low-specificity sgRNAs. Motifs in ChIP-seq peaks are shown as black boxes  
995 and CTCF motifs as green boxes.
- 996 D. Fine-mapping screen results from two regions containing enhancers of the essential gene *GATA1*. sgRNAs selected for  
997 validation studies are labeled (e.g. “1L” represents the first sgRNA with a low specificity score). ChromHMM is colored  
998 according to the 15-state scheme<sup>56</sup> (briefly, reds are predicted promoter states, yellows are enhancer states, and greens  
999 are other transcriptionally active states).
- 1000 E. The enhancer motif-targeting sgRNAs identified in **(D)** do not significantly decrease *GATA1* expression according to qPCR  
1001 ( $p > 0.05$ , ANOVA).
- 1002 F. The sgRNAs identified in **(D)** do not significantly decrease *GATA1* protein expression according to Western blot.
- 1003 G. The sgRNAs identified in **(D)** do not significantly decrease *GATA1* protein expression according to flow cytometry for *GATA1*  
1004 protein level. Additional validation data are shown in **Supplementary Figure 4**.
- 1005

### FIGURE 3

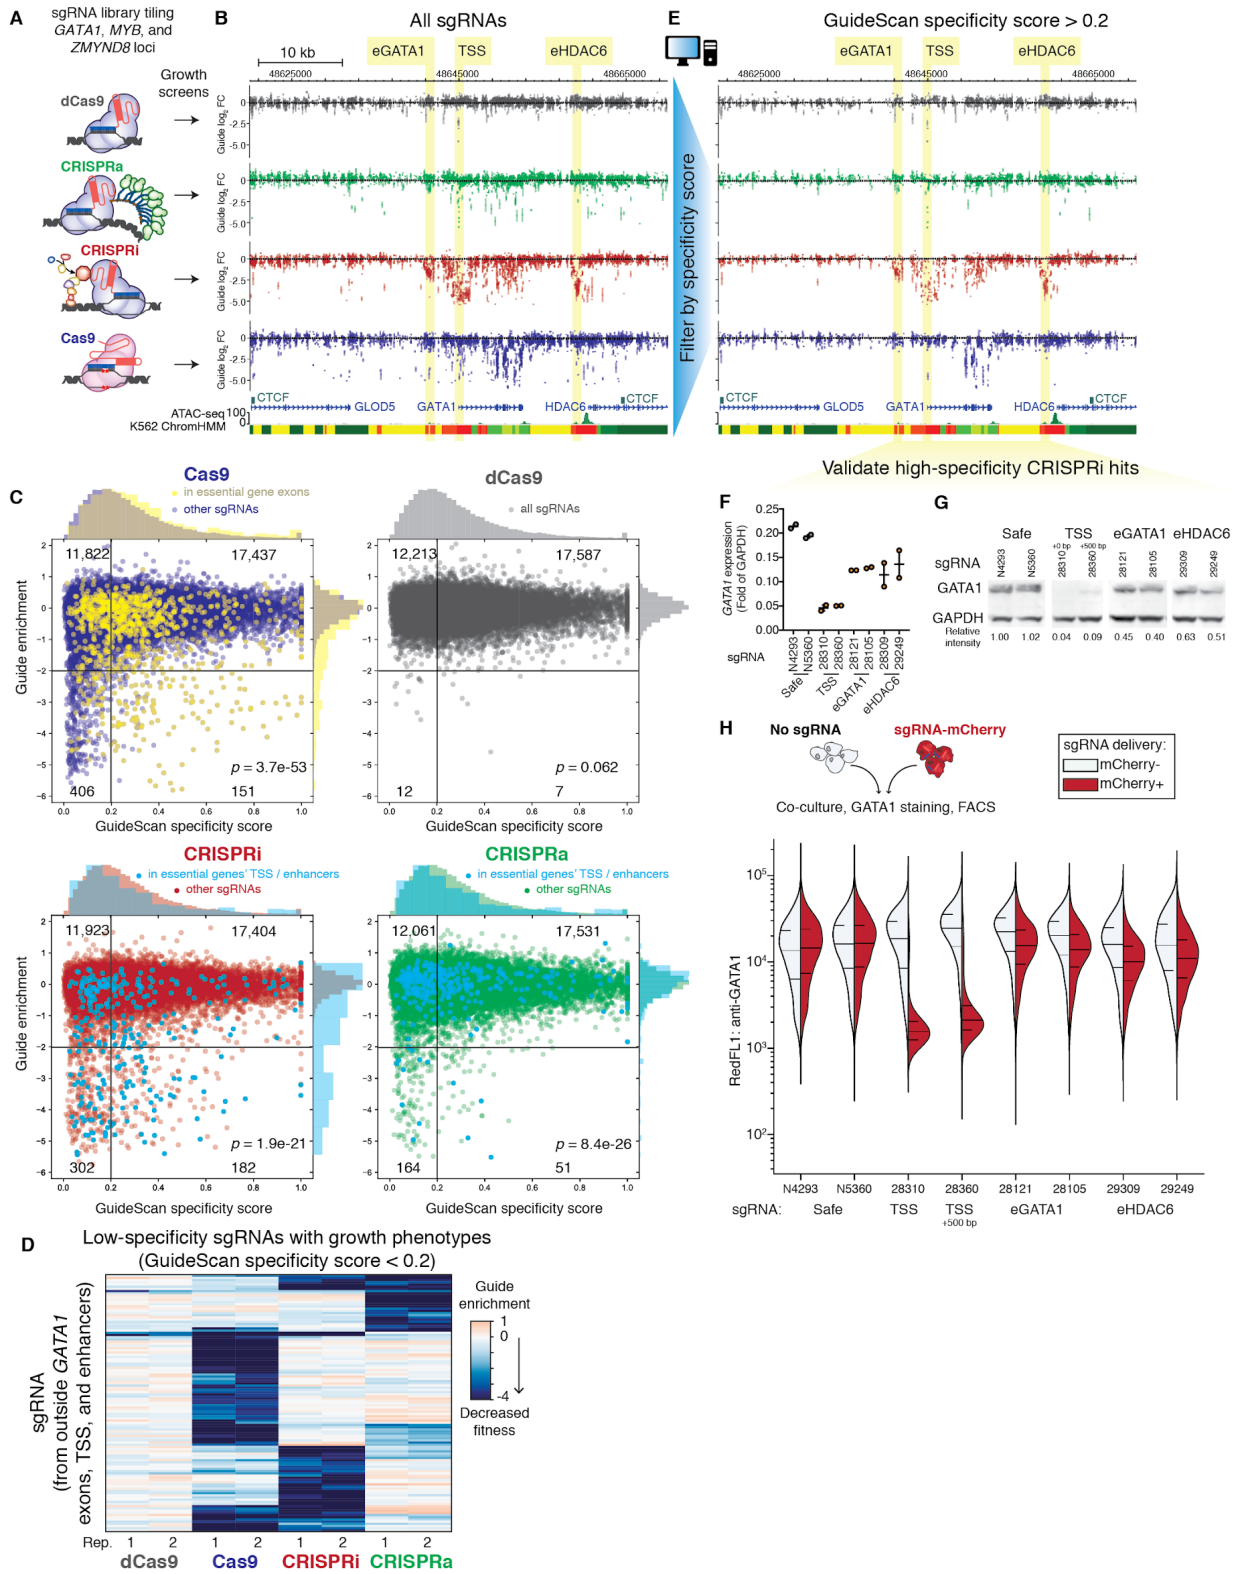



1007 **Figure 3. Filtering CRISPRi library for high specificity greatly reduces false positives and enables**  
1008 **accurate detection of moderate-strength enhancers.**

- 1009 A. Four parallel screens were conducted tiling the loci of essential growth genes *GATA1*, *MYB*, and *ZMYND8* using the four  
1010 platforms Cas9, CRISPRa, CRISPRi and dCas9.
- 1011 B. Zoomed-in view of screen data around essential gene *GATA1*. Highlighted are regulatory elements with known effects on  
1012 cell growth: enhancers eGATA1 and eHDAC6, and the *GATA1* transcription start site. ChromHMM is colored according to  
1013 the 15-state scheme<sup>56</sup> (briefly, reds are predicted promoter states, yellows are enhancer states, and greens are other  
1014 transcriptionally active states).
- 1015 C. Enrichment of growth effects among low-specificity sgRNAs. p-value from the Fisher's exact test for the 2x2 table with  
1016 quadrants as drawn and guide counts as labeled in the corners; these counts include all the sgRNAs (i.e. counts ignores  
1017 the colored categories).
- 1018 D. Clustering of low-specificity sgRNAs reveals that each perturbation has off-target activity that reduces cell fitness with a  
1019 unique subset of the low-specificity sgRNAs. Shown are the subset of sgRNAs that are upstream of eGATA1 or downstream  
1020 of eHDAC6 (i.e. sgRNAs with predominantly off-target effects) and that also have a strong guide enrichment  $\leq -3$  in at least  
1021 one replicate.
- 1022 E. Filtering with GuideScan specificity scores reduces noise while preserving true positive effects.
- 1023 F. After filtering, the CRISPRi sgRNAs in peaks have validated effects on *GATA1* expression by qPCR ( $p < 0.05$ , ANOVA).
- 1024 G. These CRISPRi sgRNAs also have validated effects on *GATA1* protein expression by Western blot.
- 1025 H. The same CRISPRi sgRNAs also have validated effects on *GATA1* protein expression by flow cytometry. Here, cells  
1026 expressing an sgRNA and mCherry were co-cultured with the blank parental cell line, stained for GATA1 protein, and  
1027 analyzed by flow cytometry. We then compared the distribution of GATA1 protein level between the mCherry+ and blank  
1028 control cells from the same sample. Horizontal lines show the median and quartiles.
- 1029
- 1030

1031

**FIGURE 4**

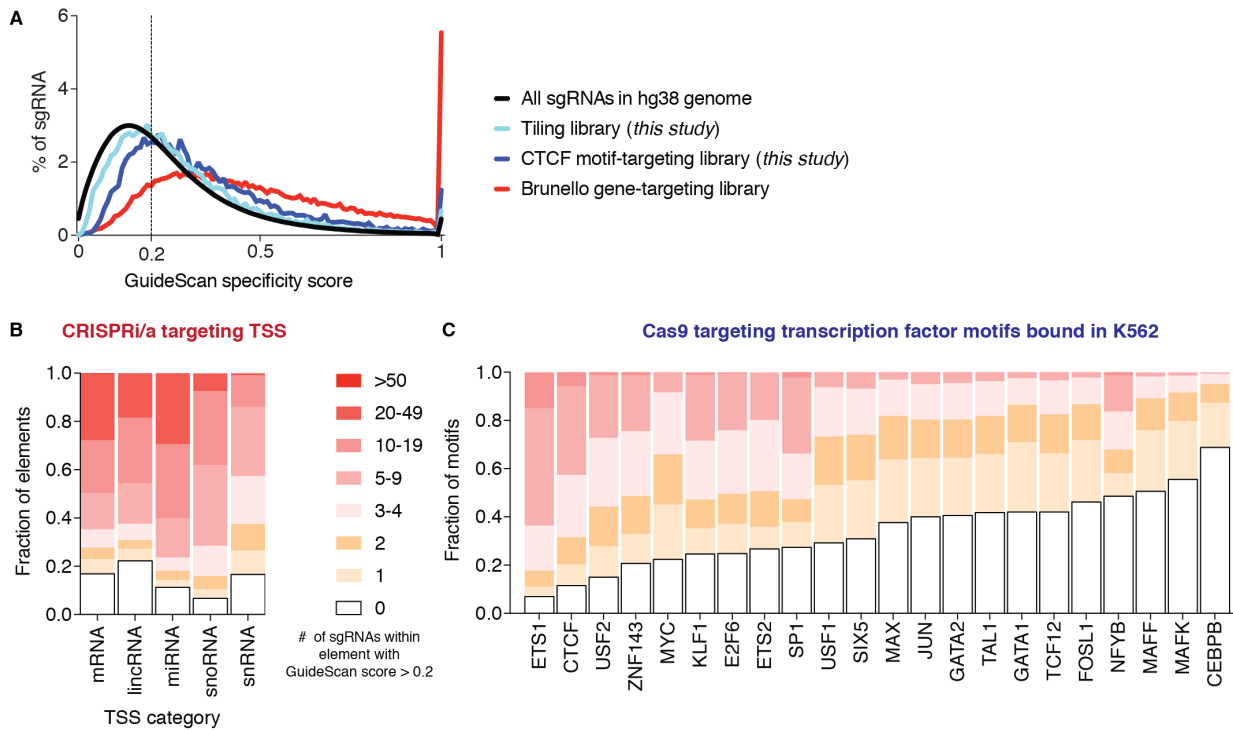

1032

**1033 Figure 4. High-specificity CRISPR-Cas9 screen designs for non-coding elements.**

1034

A. Distribution of GuideScan specificity scores for two non-coding libraries from this study and a gene-targeting library, in comparison to all possible sgRNA.

1035

B. Most TSSs can be targeted with multiple high-specificity sgRNA. Fraction of TSS in the ENCODE SCREEN database of ccREs that can be targeted with dCas9-based epigenome editors within a window of +/- 100bp, after filtering for GuideScan scores > 0.2.

1036

1037

1038

1039

1040

C. Fraction of motifs in TFBS motifs that can be targeted with sgRNAs with a cut site in the motif, after filtering out low-specificity sgRNAs.

1041 **Supplementary Figures**

**SUPPLEMENTARY FIGURE 1**

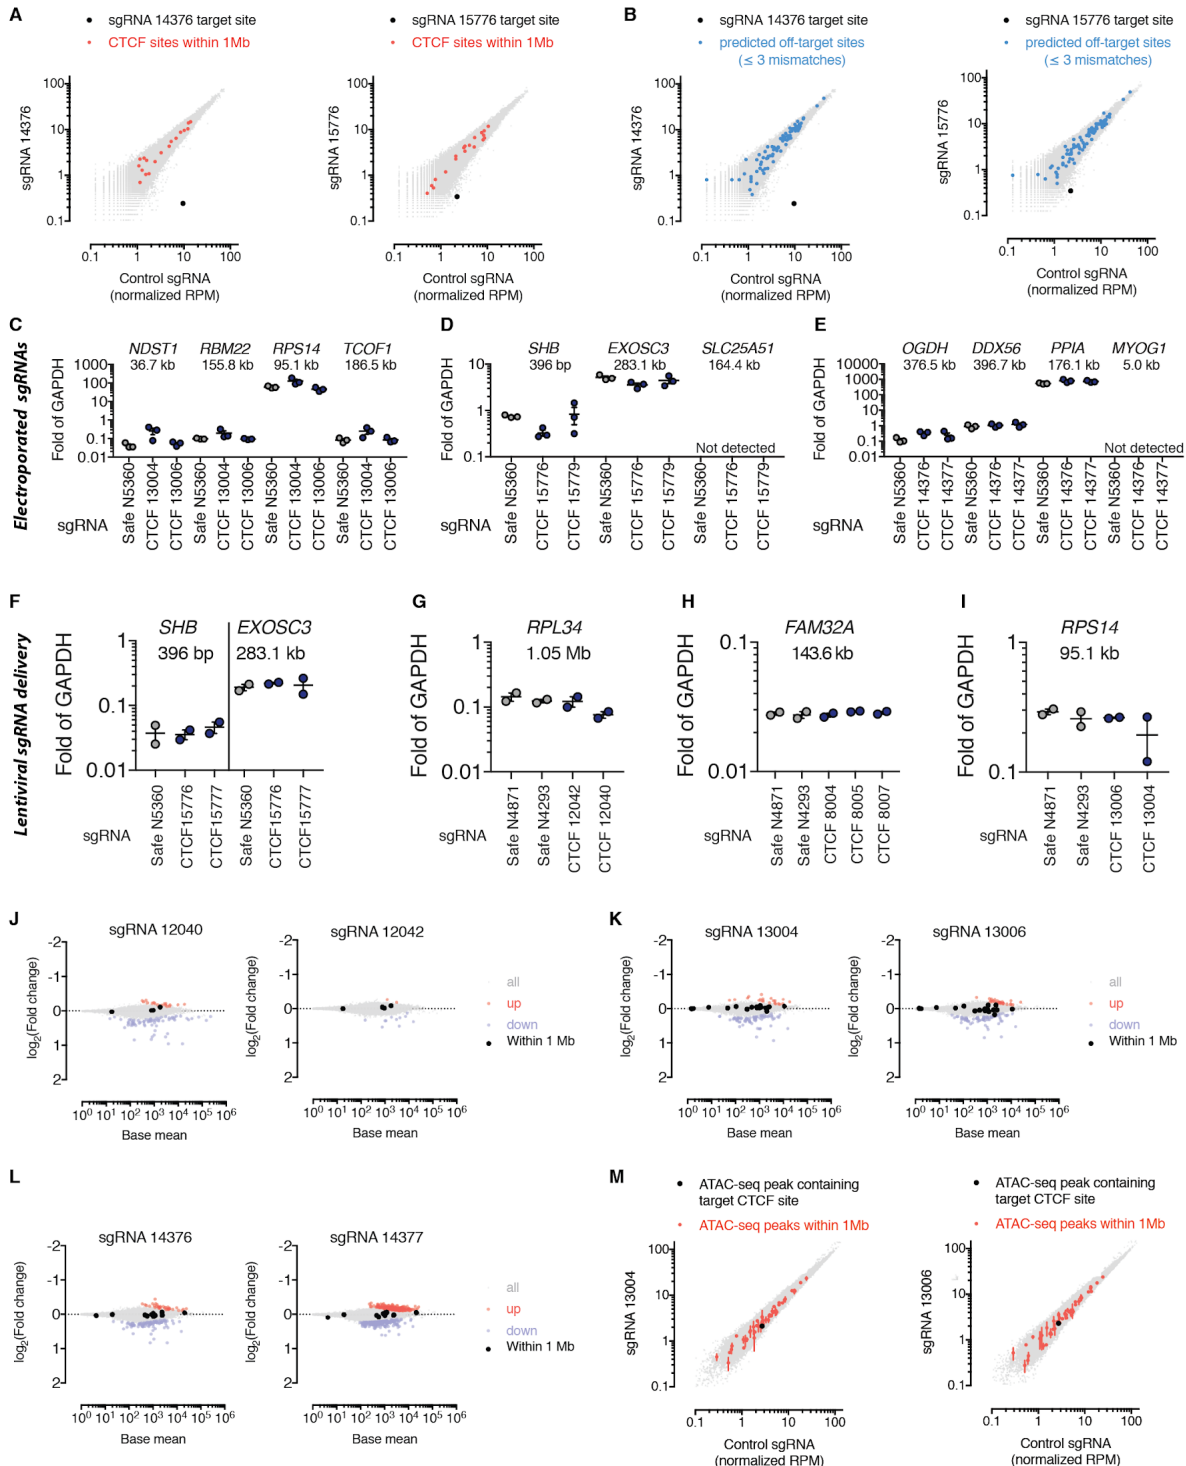

1043 **Supplementary Figure 1. Follow-up studies of individual sgRNAs targeting CTCF motifs.**

- 1044 A. sgRNA targeting CTCF sites were delivered via lentivirus to a K562-Cas9 cell line and then CTCF ChIP-seq was performed.  
1045 No other CTCF peaks within 1 Mb of the on-target location were significantly affected.
- 1046 B. No other CTCF peaks that overlap a predicted off-target site with  $\leq 3$  mismatches were affected. List of off-target sites was  
1047 provided by the Cas OFFinder webtool<sup>80</sup>.
- 1048 C. No significant changes in the expression of nearby essential genes were detected for any of the CTCF-targeting sgRNA  
1049 that were individually tested. sgRNA-mCherry plasmids were delivered by electroporation, 36 hours later the cells were  
1050 confirmed to be  $> 70\%$  mCherry+ by flow cytometry and RNA was extracted for qPCR. *NDST1* is a non-essential gene and  
1051 the CTCF motif falls within one of its introns. *RBM22*, *RPS14*, and *TCOF1* are the nearest essential genes. The distances  
1052 shown below the gene names are between the CTCF motif and the TSS of the gene.
- 1053 D. *SHB* is a non-essential gene and the CTCF motif falls within its 5' UTR; *EXOSC3* and *SLC25A51* are the nearest essential  
1054 genes.
- 1055 E. *MYOG1* is a non-essential gene and the CTCF motif falls within its intron. *OGDH*, *DDX56*, and *PPIA* are the nearest  
1056 essential genes. Genes are determined to be essential if they were called as hits with a 10% FDR in previous Cas9<sup>34</sup>, or  
1057 CRISPRi/a gene screens<sup>52</sup>.
- 1058 F. Individual sgRNAs were delivered by lentivirus, 2 days later cells were selected for sgRNA delivery with puromycin, and 5  
1059 days after delivery RNA was extracted for qPCR. Both sgRNAs labeled "CTCF" (i.e. sgRNAs 15776 and 15777) target the  
1060 same CTCF motif. Same target motif as in D.
- 1061 G. *RPL34* is the nearest essential gene.
- 1062 H. *FAM32A* is the nearest essential gene.
- 1063 I. *RPS14* is the nearest essential gene..
- 1064 J. The lenti-transduced cells were subjected to RNA-seq and the mRNA expression fold-changes compared to safe-targeting  
1065 sgRNAs is shown. The two sgRNAs target the same CTCF motif. None of the black dots (genes within 1 Mb of the motif)  
1066 are significantly differentially expressed.
- 1067 K. As in J for another target CTCF motif.
- 1068 L. As in J for another target CTCF motif.
- 1069 M. No changes in ATAC-seq peaks in the cells stably expressing CTCF-targeting sgRNAs 13004 or 13006.
- 1070
- 1071
- 1072
- 1073
- 1074
- 1075
- 1076
- 1077

## SUPPLEMENTARY FIGURE 2

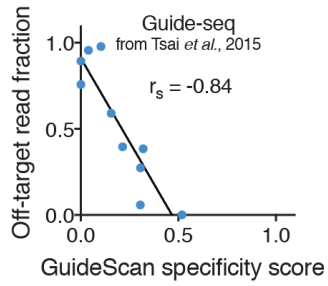

1078

1079 **Supplementary Figure 2. Validation of guide-level GuideScan specificity scores with an unbiased**  
1080 **off-target assay.**

1081 We retrieved GuideScan specificity scores for sgRNAs that were tested for off-target cleavage with the unbiased, genome-  
1082 wide assay Guide-seq<sup>27</sup>. The scores correlate with the off-target read fraction, defined as the fraction of total Guide-seq  
1083 reads that align to off-target sites. Some sgRNAs did not have GuideScan scores because they had multiple perfect genomic  
1084 matches or off-targets with only 1 mismatch; these sgRNAs were given a score of 0 for this analysis.

### SUPPLEMENTARY FIGURE 3

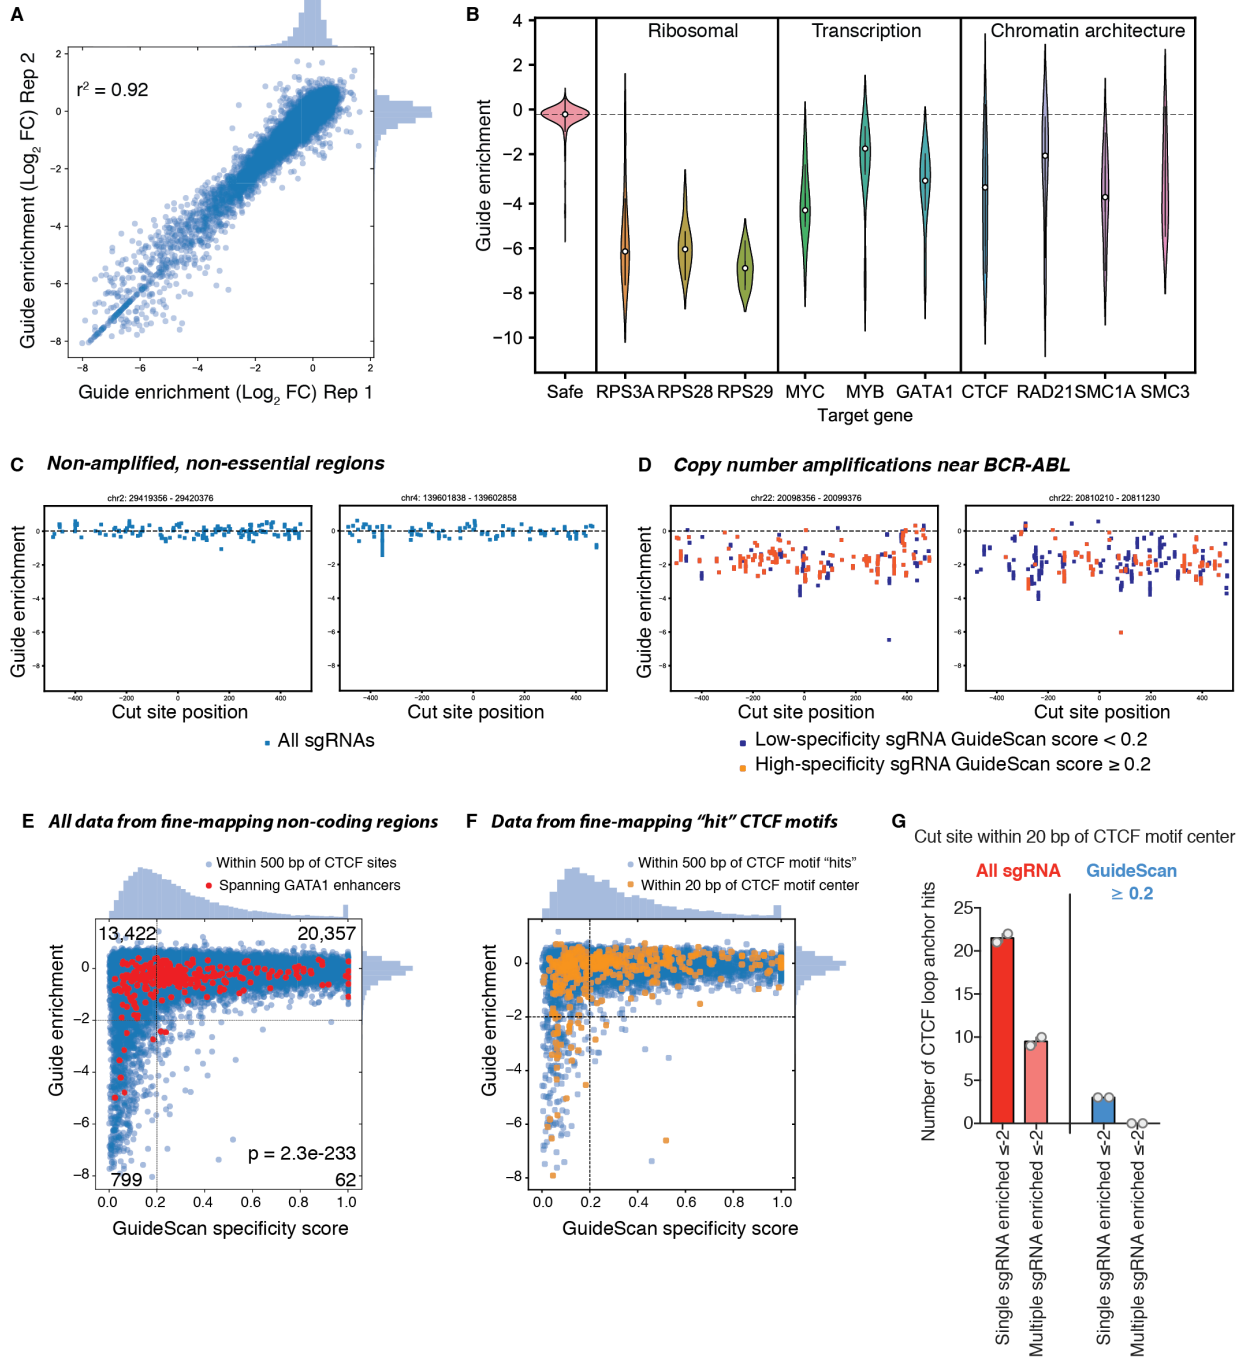

1085

1086

1087 **Supplementary Figure 3. Fine-mapping screen confirms confounding effect of off-target activity.**

- 1088 A. Reproducibility of biological replicates from a growth screen using the fine-mapping library.
- 1089 B. Positive controls demonstrate successful detection of essential genes. The targeted genes are essential <sup>7</sup>, meaning that
- 1090 targeting them should decrease cell growth. Each gene was targeted with 10 sgRNAs in its coding regions; the distribution
- 1091 of sgRNAs is shown, and the functional annotation of each gene is labeled. “Safe” refers to safe-targeting negative control
- 1092 sgRNA.
- 1093 C. Examples of two non-amplified regions without any essential elements or any sgRNA confounded by off-target activity.
- 1094 D. Examples of two copy number amplified regions near *BCR-ABL* showing a distinct uniform depletion that is unrelated to the
- 1095 specificity of the sgRNAs.
- 1096 E. Low-specificity sgRNAs, in both the CTCF-anchor and GATA1-enhancer regions, are significantly enriched to have growth
- 1097 effects (p-value from Fisher’s exact test).
- 1098 F. Shown is the subset of the fine-mapping screen from 1 kb windows around motifs that previously had evidence of strong
- 1099 essentiality in the CTCF motif-targeting screen.
- 1100 G. There were no CTCF motifs with concordant evidence of fitness effects from multiple high-specificity sgRNAs, despite
- 1101 targeting 37 CTCF motifs with multiple high-specificity sgRNA and these CTCF sites previously being called as “hits” in the
- 1102 CTCF motif-targeting sgRNA screen. Grey circles are screen biological replicates and the bar marks the mean value.
- 1103
- 1104

## SUPPLEMENTARY FIGURE 4

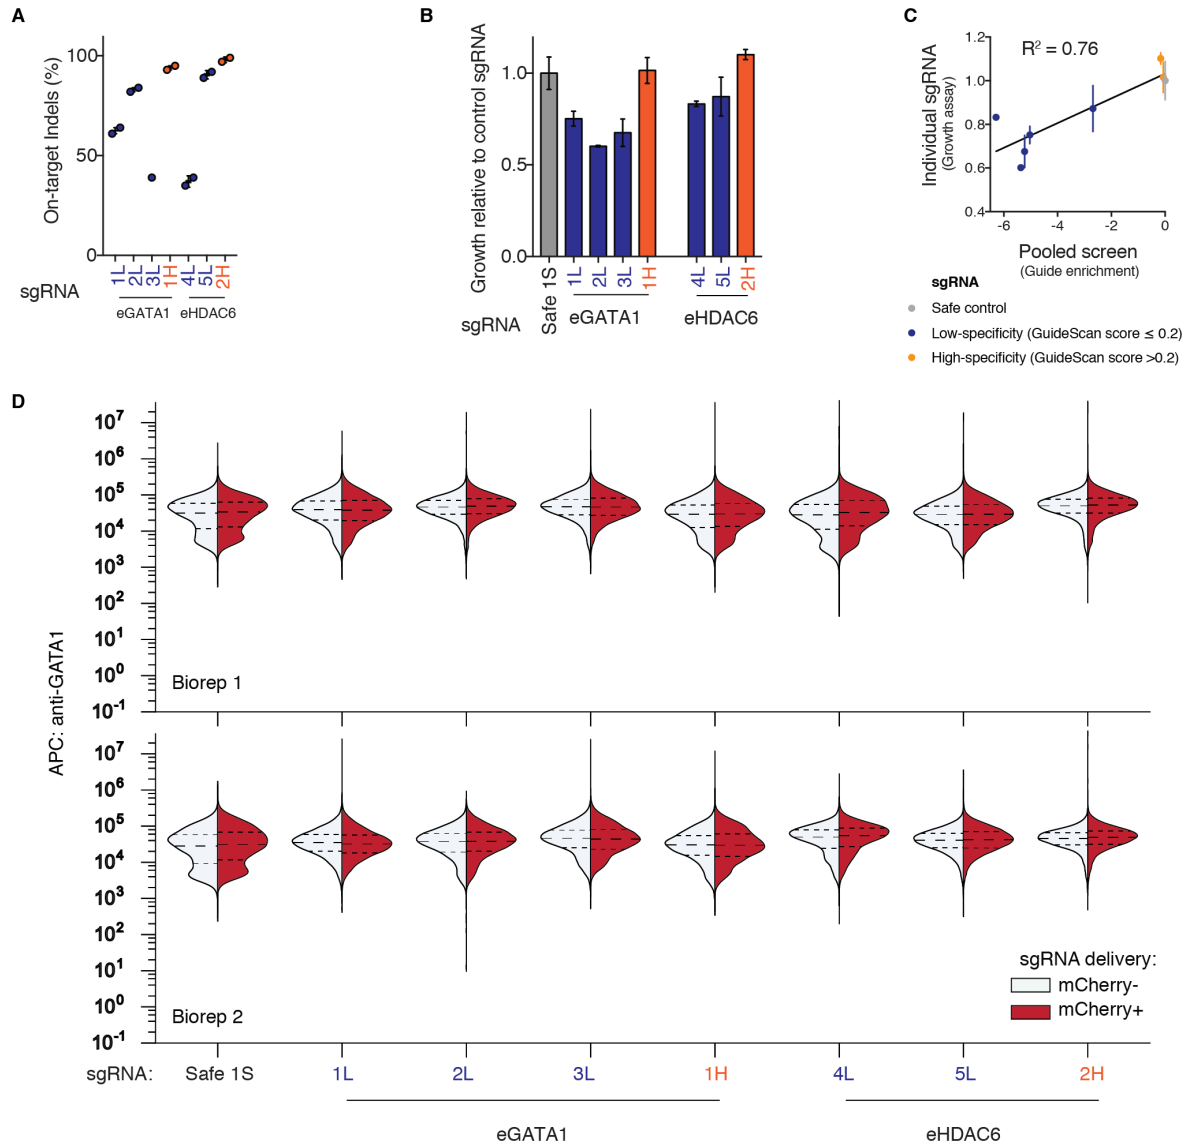

1105

### 1106 Supplementary Figure 4. Validation experiments for fine-mapping screen of enhancers of GATA1.

- 1107 A. Individual sgRNAs generated on-target indels in K562 after lentiviral delivery and puromycin selection, as quantified by ICE  
 1108 analysis<sup>81,82</sup>.
- 1109 B. Competitive growth assay validated expected growth effects in these individual cell lines.
- 1110 C. Individually measured growth effects correlate with the pooled screen measurements.
- 1111 D. Additional flow cytometry for GATA1 protein levels confirmed there was no change in expression of GATA1 in these cell  
 1112 lines. Cells transduced with the sgRNA-mCherry lentiviral vector were co-cultured with non-transduced parental cells and  
 1113 then stained and analyzed by FACS together in order to control for variation in staining efficiency between samples. In all  
 1114 samples, the distribution of GATA1 levels is not significantly different between the mCherry+ and blank cells. Dashed lines  
 1115 within the histograms mark the quartiles. sgRNA labeled as in **Figure 2**.



## SUPPLEMENTARY FIGURE 5

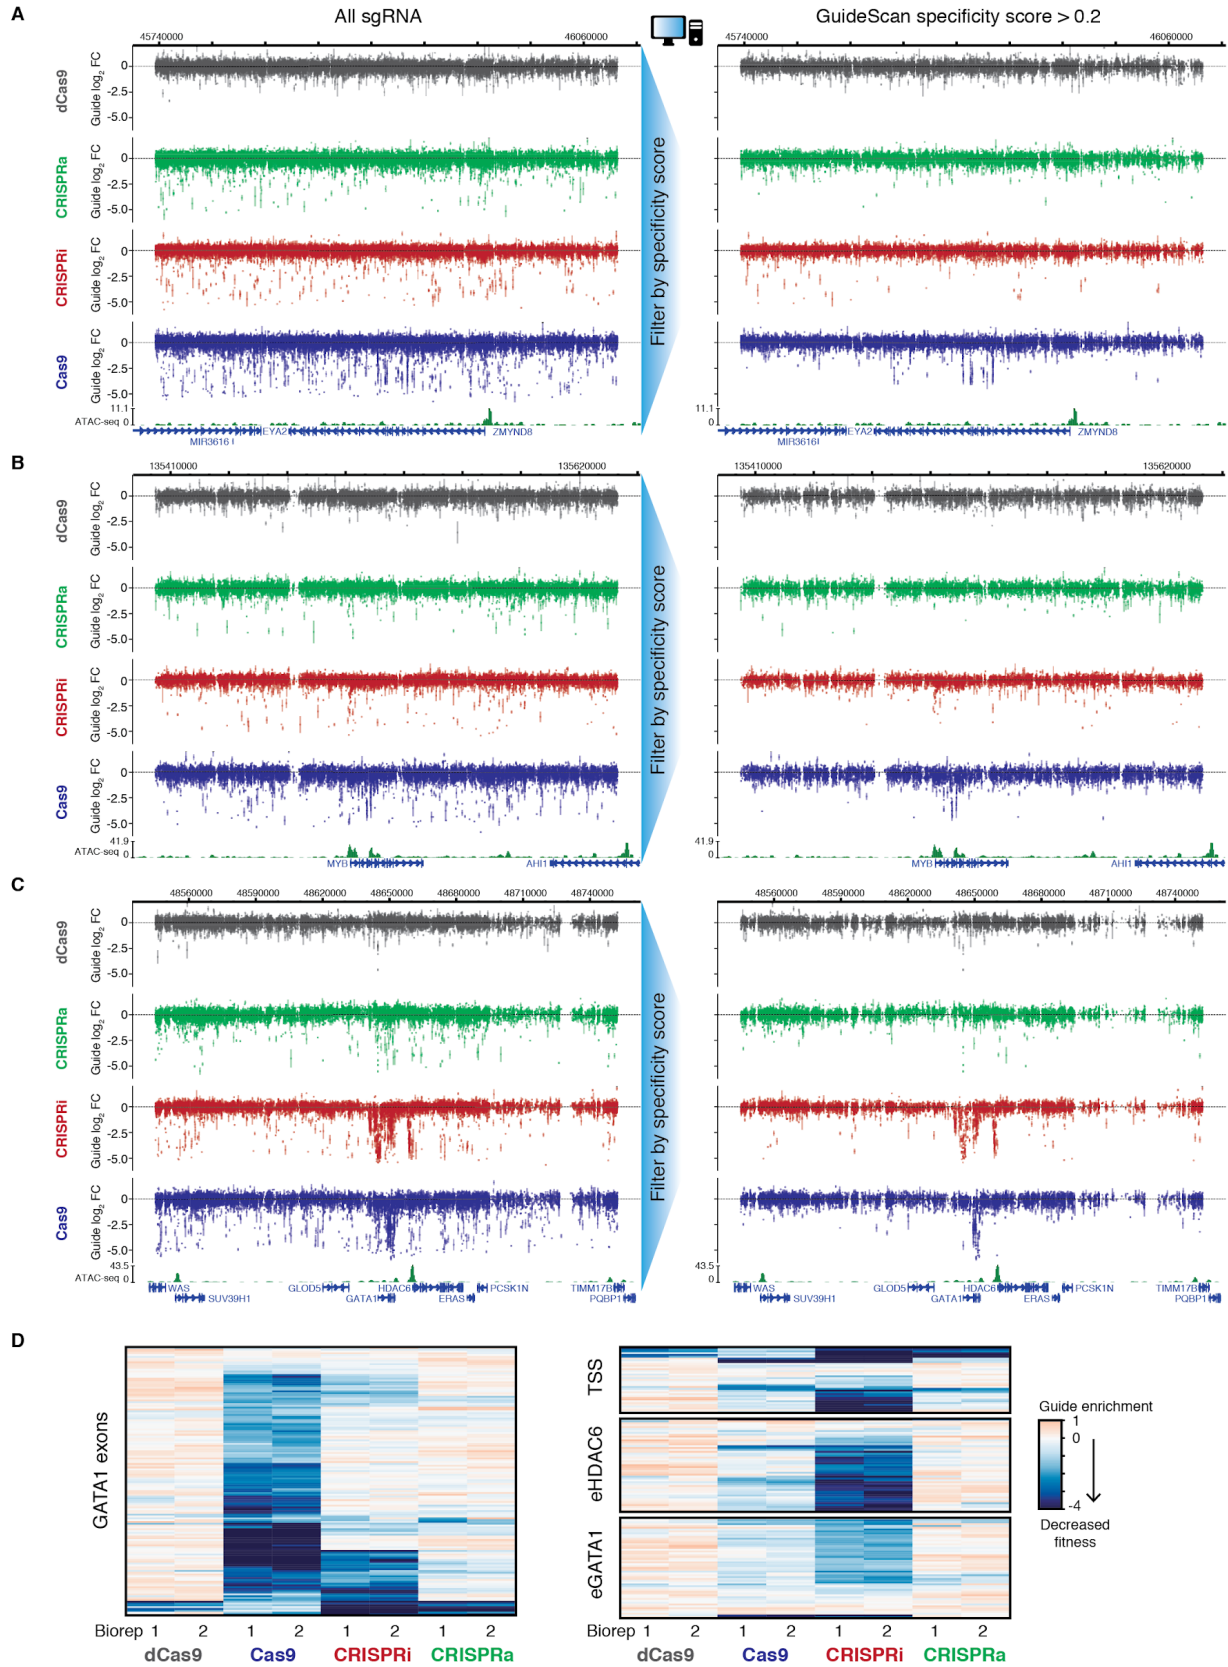

1117 **Supplementary Figure 5. Tiling screens of three regions around essential genes with four CRISPR-**  
1118 **Cas9 perturbations.**

1119 A. Four parallel screens were conducted tiling the loci of essential growth genes *GATA1*, *MYB*, and *ZMYND8* using the four  
1120 platforms Cas9, CRISPRa, CRISPRi and dCas9. Shown is the full tiled region around *ZMYND8* with and without filtering for  
1121 high-specificity sgRNAs with the GuideScan score.

1122 B. Full tiled region around *MYB*.

1123 C. Full tiled region around *GATA1*.

1124 D. Clustering of sgRNAs from the *GATA1* tiling screen that target regions with expected on-target effects (exons, TSS, and  
1125 enhancers).

1126

1127

1128

1129

## SUPPLEMENTARY FIGURE 6

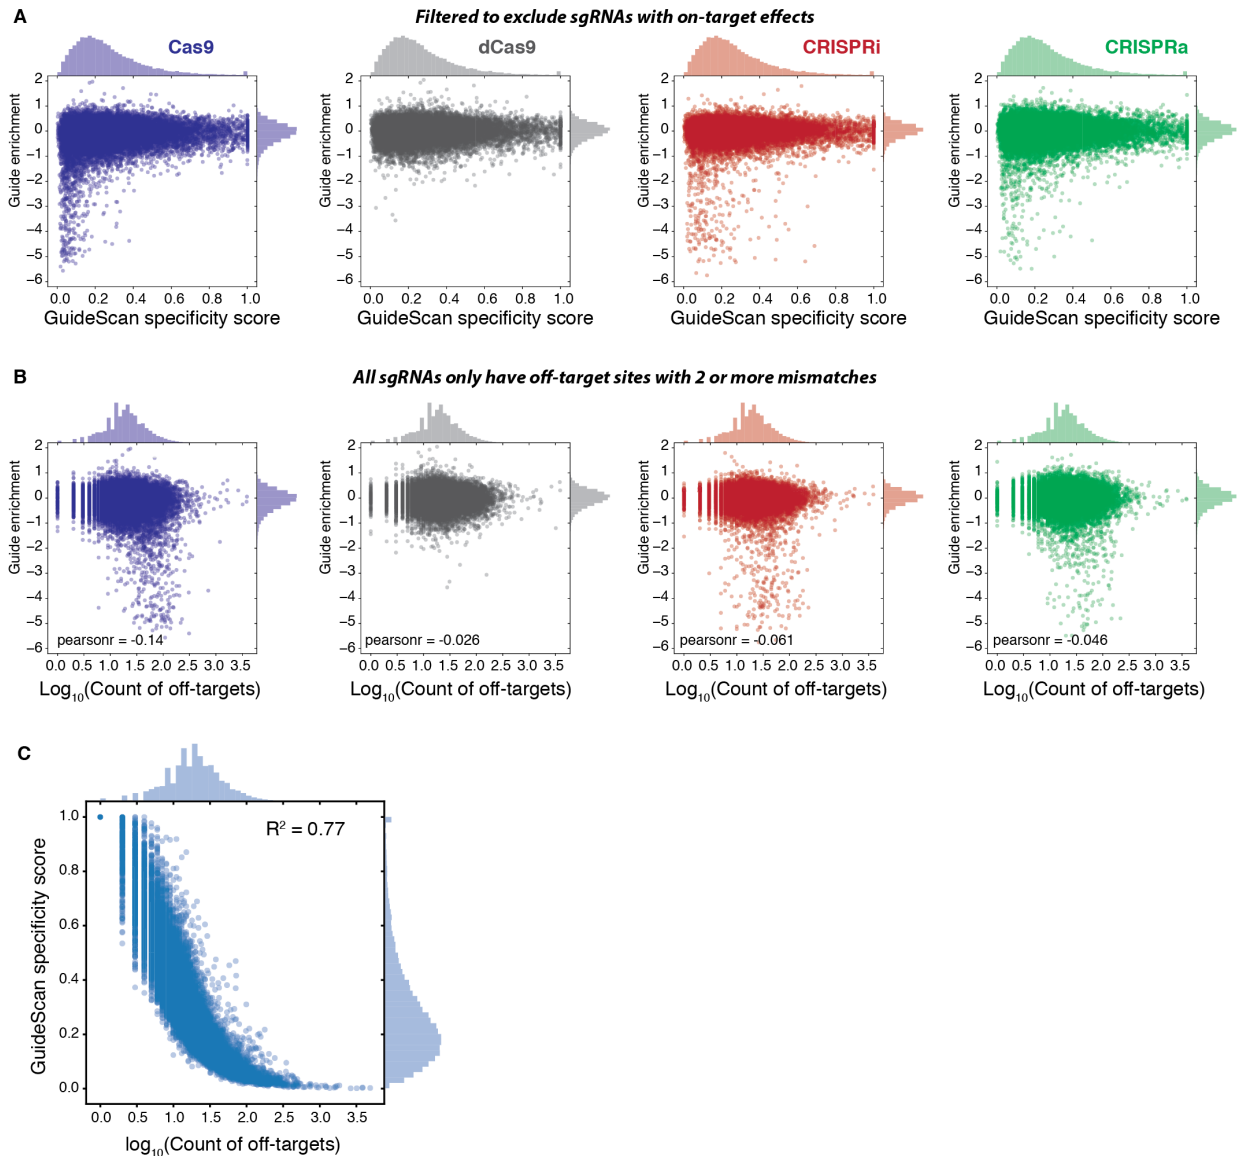

1130

1131 **Supplementary Figure 6. Comparison of fitness effects and specificity scores with the number of**  
1132 **off-target binding locations.**

- 1133 A. Comparison of GuideScan scores with fitness effects in the tiling screen, filtered to exclude sgRNAs that are likely to have  
1134 on-target growth effects by removing sgRNAs 1000 bp upstream to 1000 bp downstream of *ZMYND8* or *MYB* coding  
1135 sequences, and 1000 bp upstream of *eGATA1* to 1000 bp downstream of *eHDAC6*. For the similar plot that includes those  
1136 sgRNAs, see **Figure 3C**. sgRNAs with multiple perfect matches to the genome or off-target locations with only 1 mismatch  
1137 are not searchable within the GuideScan trie data structure and were excluded from this library.
- 1138 B. For the same set of sgRNAs in **A**, we compared the guide enrichment from the tiling screen with the number of off-target  
1139 binding locations that have 2-3 mismatches. The off-target search was done with GuideScan.
- 1140 C. For comparison, the relationship between the GuideScan specificity score and the number of off-target locations for the  
1141 same sgRNAs in the tiling screen library.

1142

### SUPPLEMENTARY FIGURE 7

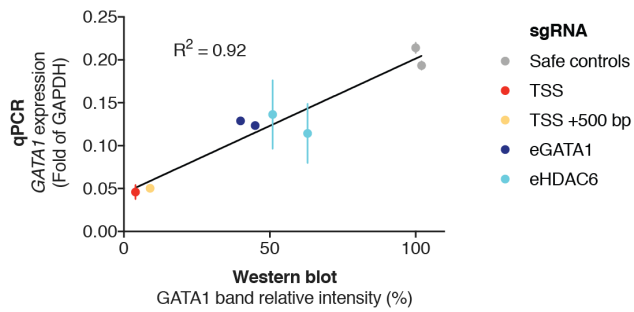

1143

1144 **Supplementary Figure 7. Validation of CRISPRi repression of essential enhancers with high-**  
1145 **specificity sgRNAs.**

1146 After delivery of individual sgRNA by lentivirus, followed by puromycin selection, we performed qPCR for GATA1 mRNA  
1147 levels and a Western blot for GATA1 protein levels (shown in **Figure 3**). The knockdown measurements are correlated.

1148

## SUPPLEMENTARY FIGURE 8

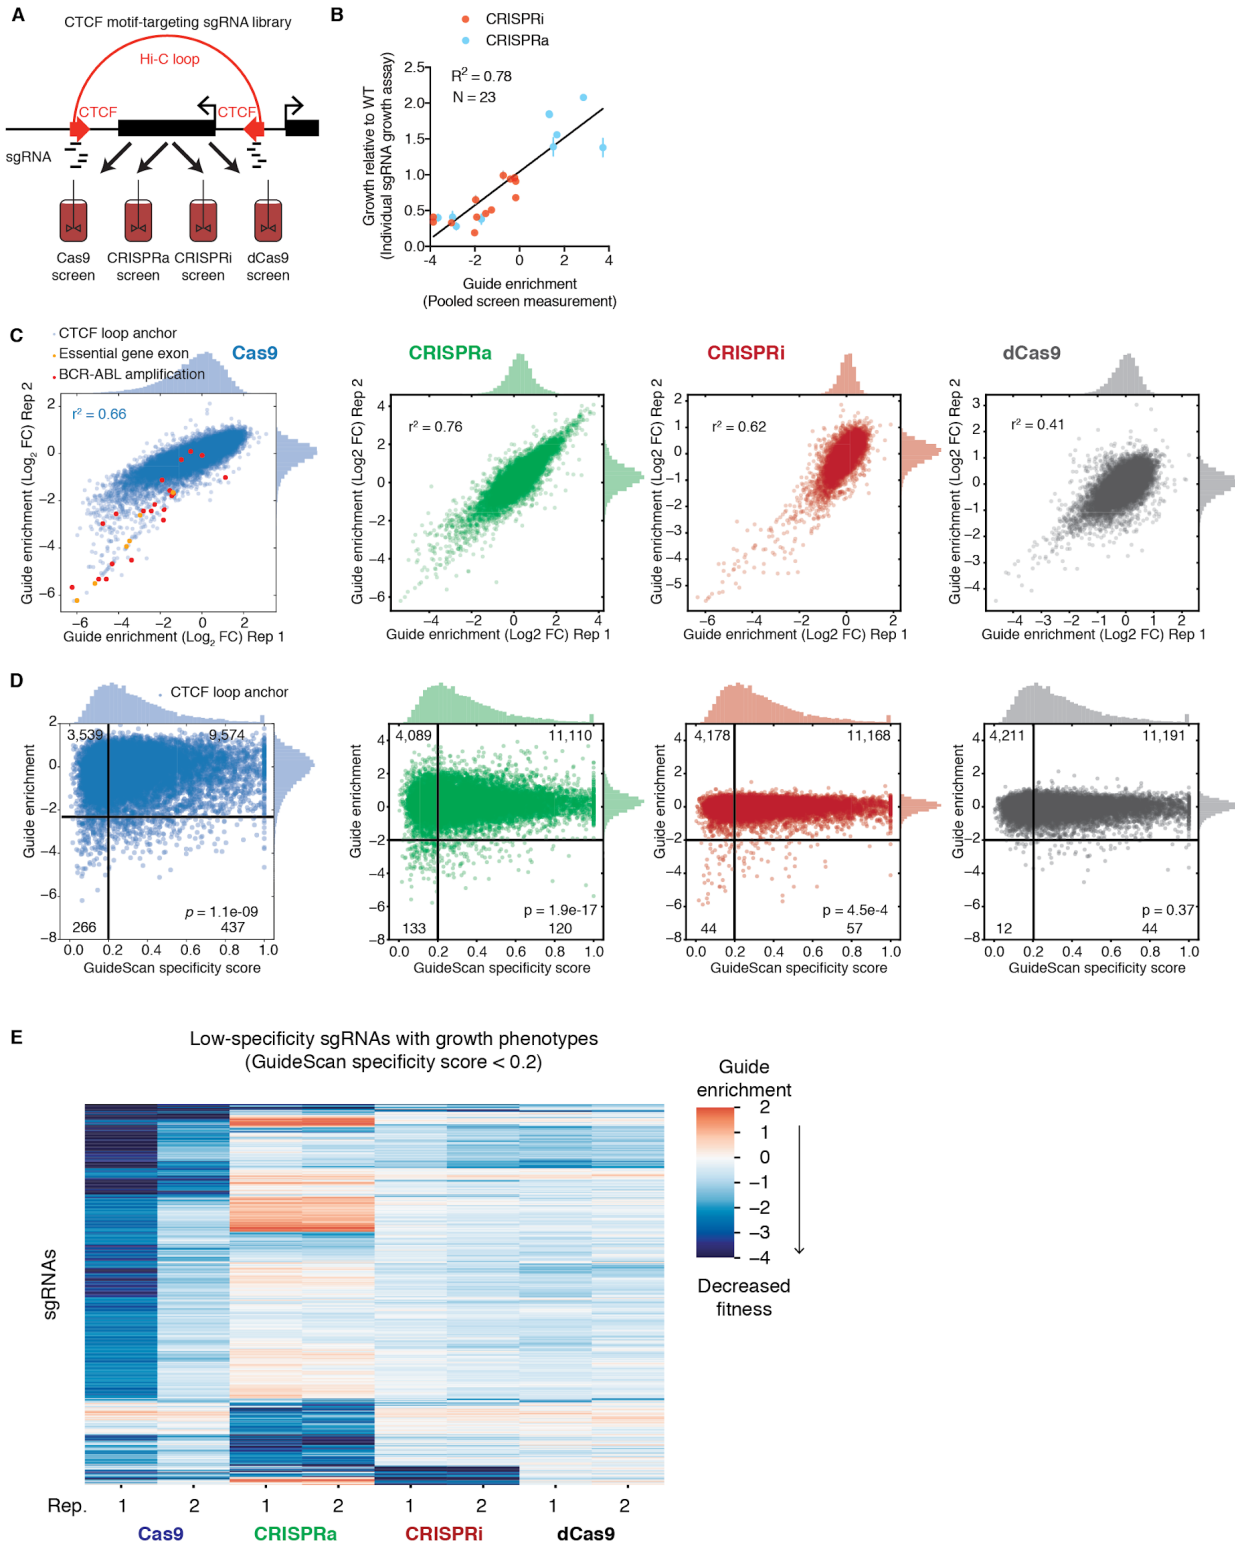

1150 **Supplementary Figure 8. Parallel screens of CTCF loop anchors with Cas9, CRISPRi/a, and dCas9.**

- 1151 A. The CTCF motif-targeting sgRNA library was used in parallel screens to compare the CRISPR-Cas9 platforms. All screens  
1152 shown here were maintained at 3000x coverage (cells per sgRNA), whereas the Cas9 screens shown in **Figure 1** were  
1153 maintained at 11,000x coverage.
- 1154 B. Growth effects measured in this screen were validated with individual competitive growth assays. Validation of Cas9 effects  
1155 shown in **Figure 1**. Error bars are standard deviation of three technical replicates.
- 1156 C. Reproducibility between biological replicates. For CRISPRi/a, sgRNAs  $\leq 1000$  bp from the TSS of an essential gene  
1157 identified in a previous CRISPRi/a gene screen were excluded to avoid on-target artifacts.
- 1158 D. Low-specificity guides are significantly enriched among CTCF motif-targeting guides with fitness effects when using  
1159 CRISPRi/a. P-value from Fisher's exact test, using a 2x2 table of the numbers of guides in each quadrant based on the  
1160 thresholds drawn in black lines. Numbers in corners correspond to the number of CTCF site-targeting guides in the quadrant.  
1161 sgRNAs with  $> 1$  perfect matches to the genome or  $> 0$  off-target locations with only 1 mismatch were excluded from this  
1162 analysis, as before. Notably, the Cas9 screen shown here was maintained at lower coverage and thus resulted in noisier  
1163 data than the replicates shown in **Figure 1**. It showed a significant, but less pronounced, enrichment for low-specificity  
1164 guides among the guides with fitness effects (Fisher's exact test) than in the higher quality screen data shown in **Figure 1**,  
1165 showing that experimental noise can disguise the confounding effect of off-target activity.
- 1166 E. Clustering of low-specificity sgRNAs reveals that each perturbation has off-target activity that reduces cell fitness with a  
1167 unique subset of the low-specificity sgRNAs. Shown are the subset of low-specificity sgRNAs that have a guide enrichment  
1168  $\leq 2$  in at least one replicate.  
1169

1170

**SUPPLEMENTARY FIGURE 9**

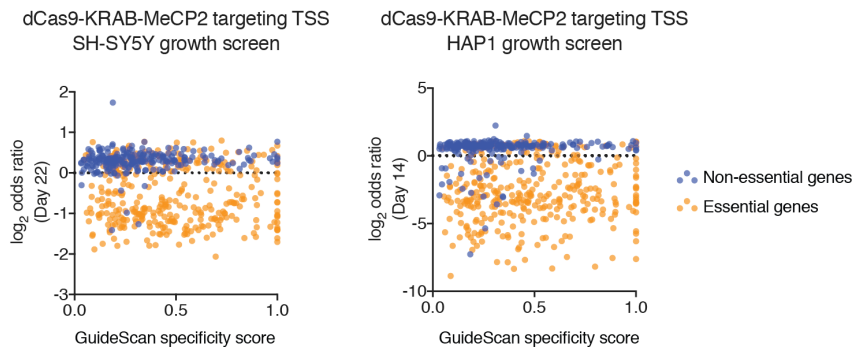

1171

**1172 Supplementary Figure 9. Low-specificity sgRNAs can have growth effects in other cell types with**  
**1173 other forms of CRISPRi.**

1174 We retrieved data from a published growth screen where sgRNAs were targeted to the TSS of known essential and non-  
1175 essential genes<sup>59</sup>, in different cell types. The marked depletion of sgRNAs targeting non-essential genes was unexpected  
1176 and the authors discussed the need for further investigations to clarify the source of these effects. Here, we found that these  
1177 sgRNAs have low specificity scores, implicating off-target activity. However, the enrichment was not significant, possibly  
1178 due to the small number of sgRNAs in the dataset.

1179

## SUPPLEMENTARY FIGURE 10

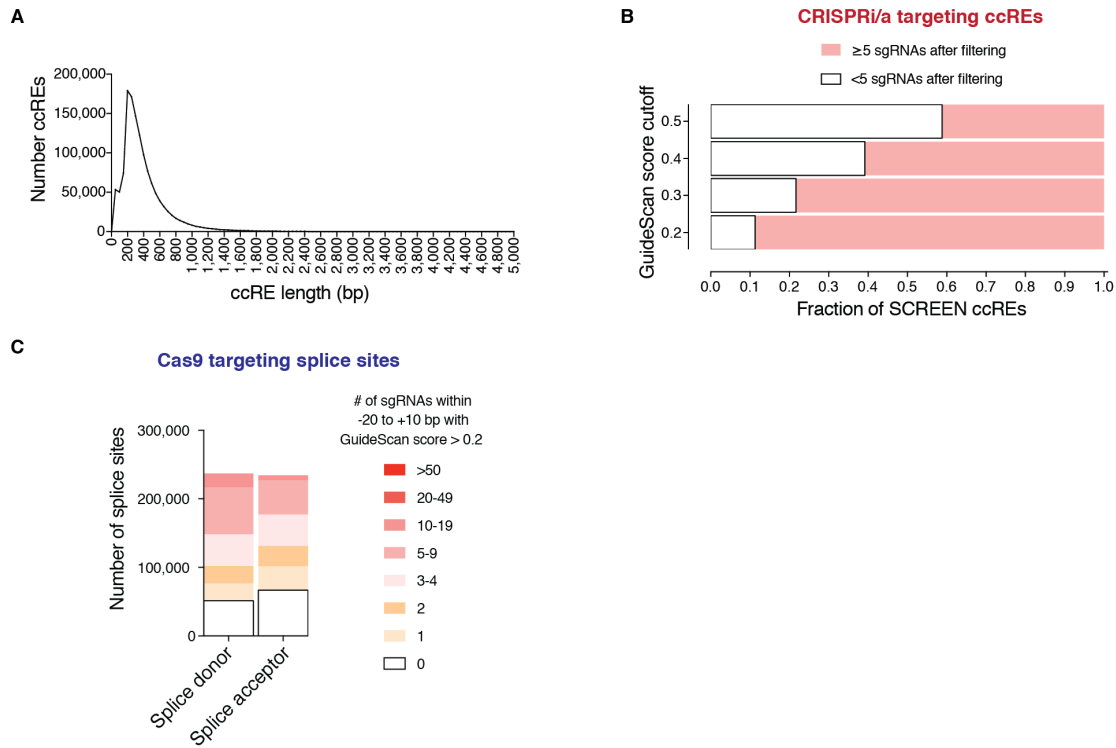

1180

1181 **Supplementary Figure 10. Filtered library designs for regulatory elements and splice sites.**

- 1182 A. ccREs were retrieved from the ENCODE SCREEN database and their distribution of lengths is shown.
- 1183 B. Various GuideScan score filtering cutoffs were applied to the sets of sgRNAs overlapping the ccREs. 89% of ccREs can be
- 1184 targeted with  $\geq 5$  sgRNAs with GuideScan scores  $> 0.2$ , enabling CRISPRi/a screens of ccREs with high-specificity libraries.
- 1185 C. Fraction of splice sites that can be targeted with sgRNAs within a window (-20 to +10 bp), after filtering out low-specificity
- 1186 sgRNAs.
